# Supplementary material for: Diastereoselective synthesis, structure and reactivity studies of ferrocenyloxazoline gold(i) and gold(ii) complexes
Source: Royal Society of Chemistry journal article supplement (doi:10.1039/c8dt00109j), 2018-01-01
Supplement: c8dt00109j1.pdf [file c8dt00109j1.pdf]

## Supporting Information

### **Diastereoselective Synthesis, Structural and Reactivity Studies of Ferrocenyloxazoline Gold(I) and Gold(II) Complexes**

**Julia Holz, Marta Ayerbe Garcia, Wolfgang Frey, Felix Krupp, and René Peters\***

Institut für Organische Chemie, Universität Stuttgart, Pfaffenwaldring 55, D-70569 Stuttgart, Germany.

## Content

|                                                                                                                                                                                                                                                                                           |    |
|-------------------------------------------------------------------------------------------------------------------------------------------------------------------------------------------------------------------------------------------------------------------------------------------|----|
| NMR Spectra.....                                                                                                                                                                                                                                                                          | 4  |
| (4 <i>R</i> ,5 <i>S</i> )-(4,5-5 <i>H</i> -Indeno[1,2- <i>d</i> ]-4,5-dihydro-2-oxazolyl) ferrocene ( <b>IndFO</b> ) .....                                                                                                                                                                | 4  |
| (4 <i>R</i> ,5 <i>S</i> , <i>S</i> <sub>p</sub> )-(4,5-5 <i>H</i> -Indeno[1,2- <i>d</i> ]-4,5-dihydro-2-oxazolyl)-2-methyl ferrocene ( <b>IndFOMe</b> ) .....                                                                                                                             | 5  |
| (4 <i>R</i> ,5 <i>R</i> , <i>S</i> <sub>p</sub> )-(4,5-Diphenyl-4,5-dihydro-2-oxazolyl)-2-methyl ferrocene ( <b>Ph<sub>2</sub>FOMe</b> ) .....                                                                                                                                            | 6  |
| ( <i>S</i> )-(4-Isopropyl-4,5-dihydro-2-oxazolyl)-2,5-dimethyl ferrocene ( <b><i>i</i>PrFOMe<sub>2</sub></b> ).....                                                                                                                                                                       | 7  |
| ( <i>S</i> , <i>S</i> <sub>p</sub> )-(4-Isopropyl-4,5-dihydro-2-oxazolyl)-2-trimethylsilyl-5-methyl ferrocene ( <b><i>i</i>PrFOTMSMe</b> ) .....                                                                                                                                          | 8  |
| ( <i>S</i> )-(4- <i>Tert</i> -butyl-4,5-dihydro-2-oxazolyl)-2,5-dimethyl ferrocene ( <b><i>t</i>BuFOMe<sub>2</sub></b> ) .....                                                                                                                                                            | 9  |
| (4 <i>R</i> ,5 <i>S</i> )-(4,5-5 <i>H</i> -Indeno[1,2- <i>d</i> ]-4,5-dihydro-2-oxazolyl)-2,5-dimethyl ferrocene ( <b>IndFOMe<sub>2</sub></b> ).....                                                                                                                                      | 10 |
| (4 <i>R</i> ,5 <i>R</i> )-(4,5-Diphenyl-4,5-dihydro-2-oxazolyl)-2,5-dimethyl ferrocene ( <b>Ph<sub>2</sub>FOMe<sub>2</sub></b> ).....                                                                                                                                                     | 11 |
| Bis[μ-[(η <sup>5</sup> -( <i>S</i> , <i>R</i> <sub>p</sub> )-2-(4'-isopropyl-4',5'-dihydro-2'-oxazolyl-κ <i>N</i> )-cyclopentadienyl-κ <i>C</i> )(η <sup>5</sup> -cyclopentadienyl) ferrocene]] digold(I) ( <b>(<i>R</i><sub>p</sub>)-<i>i</i>PrFOAu(I)</b> ) .....                       | 12 |
| Bis[μ-[(η <sup>5</sup> -( <i>S</i> , <i>R</i> <sub>p</sub> )-2-(4'-isopropyl-4',5'-dihydro-2'-oxazolyl-κ <i>N</i> )-3-methyl-cyclopentadienyl-κ <i>C</i> )(η <sup>5</sup> -cyclopentadienyl) ferrocene]] digold(I) ( <b><i>i</i>PrFOMeAu(I)</b> ) .....                                   | 13 |
| Bis[μ-[(η <sup>5</sup> -( <i>S</i> , <i>R</i> <sub>p</sub> )-2-(4'-isopropyl-4',5'-dihydro-2'-oxazolyl-κ <i>N</i> )-3-trimethylsilyl-cyclopentadienyl-κ <i>C</i> )(η <sup>5</sup> -cyclopentadienyl) ferrocene]] digold(I) ( <b><i>i</i>PrFOTMSAu(I)</b> ) .....                          | 14 |
| Bis[μ-[(η <sup>5</sup> -( <i>S</i> , <i>R</i> <sub>p</sub> )-2-(4'- <i>tert</i> -butyl-4',5'-dihydro-2'-oxazolyl-κ <i>N</i> )-3-methyl-cyclopentadienyl-κ <i>C</i> )(η <sup>5</sup> -cyclopentadienyl) ferrocene]] digold(I) ( <b><i>t</i>BuFOMeAu(I)</b> ).....                          | 15 |
| Bis[μ-[(η <sup>5</sup> -( <i>S</i> , <i>S</i> <sub>p</sub> )-2-(4',5'-5' <i>H</i> -Indeno[1,2- <i>d</i> ]-4',5'-dihydro-2'-oxazolyl-κ <i>N</i> )-3-methyl-cyclopentadienyl-κ <i>C</i> )(η <sup>5</sup> -cyclopentadienyl) ferrocene]] digold(I) ( <b>IndFOMeAu(I)</b> ) .....             | 16 |
| Bis[μ-[(η <sup>5</sup> -( <i>S</i> , <i>S</i> <sub>p</sub> )-2-(4',5'-diphenyl-4',5'-dihydro-2'-oxazolyl-κ <i>N</i> )-3-methyl-cyclopentadienyl-κ <i>C</i> )(η <sup>5</sup> -cyclopentadienyl) ferrocene]] digold(I) ( <b>Ph<sub>2</sub>FOMeAu(I)</b> ) .....                             | 17 |
| <i>rac</i> -Bis[μ-[(η <sup>5</sup> -2-(2'-oxazolyl-κ <i>N</i> )-3-methyl-cyclopentadienyl-κ <i>C</i> )(η <sup>5</sup> -cyclopentadienyl) ferrocene]] digold(I) ( <b>H<sub>2</sub>FOMeAu(I)</b> ) .....                                                                                    | 18 |
| <i>rac</i> -Bis[μ-[(η <sup>5</sup> -2-(4',5'-Dihydro-4',4'-dimethyl-2'-oxazolyl-κ <i>N</i> )-3-methyl-cyclopentadienyl-κ <i>C</i> )(η <sup>5</sup> -cyclopentadienyl) ferrocene]] digold(I) ( <b>Me<sub>2</sub>FOMeAu(I)</b> ).....                                                       | 19 |
| <i>rac</i> -Bis[μ-[(η <sup>5</sup> -2-(2'-oxazolyl-κ <i>N</i> )-cyclopentadienyl-κ <i>C</i> )(η <sup>5</sup> -cyclopentadienyl) ferrocene]] digold(I) ( <b>H<sub>2</sub>FOAu(I)</b> ) .....                                                                                               | 20 |
| <i>rac</i> -Bis[μ-[(η <sup>5</sup> -2-(4',5'-Dihydro-4',4'-dimethyl-2'-oxazolyl-κ <i>N</i> )-cyclopentadienyl-κ <i>C</i> )(η <sup>5</sup> -cyclopentadienyl) ferrocene]] digold(I) ( <b>Me<sub>2</sub>FOAu(I)</b> ) .....                                                                 | 21 |
| Dichlorobis[μ-[(η <sup>5</sup> -( <i>S</i> , <i>R</i> <sub>p</sub> )-2-(4'-isopropyl-4',5'-dihydro-2'-oxazolyl-κ <i>N</i> )-3-methyl-cyclopentadienyl-κ <i>C</i> 1)(η <sup>5</sup> -cyclopentadienyl) ferrocene]] digold(II) ( <b><i>i</i>PrFOMeAu(II)Cl</b> ).....                       | 22 |
| Dichlorobis[μ-[(η <sup>5</sup> -( <i>S</i> , <i>R</i> <sub>p</sub> )-2-(4'-isopropyl-4',5'-dihydro-2'-oxazolyl-κ <i>N</i> )-3-trimethylsilyl-cyclopentadienyl-κ <i>C</i> )(η <sup>5</sup> -cyclopentadienyl) ferrocene]] digold(II) ( <b><i>i</i>PrFOTMSAu(II)Cl</b> ) .....              | 23 |
| Dichlorobis[μ-[(η <sup>5</sup> -( <i>S</i> , <i>R</i> <sub>p</sub> )-2-(4'- <i>tert</i> -butyl-4',5'-dihydro-2'-oxazolyl-κ <i>N</i> )-3-methyl-cyclopentadienyl-κ <i>C</i> )(η <sup>5</sup> -cyclopentadienyl) ferrocene]] digold(II) ( <b><i>t</i>BuFOMeAu(II)Cl</b> ) .....             | 24 |
| Dichlorobis[μ-[(η <sup>5</sup> -( <i>S</i> , <i>S</i> <sub>p</sub> )-2-(4',5'-5' <i>H</i> -Indeno[1,2- <i>d</i> ]-4',5'-dihydro-2'-oxazolyl-κ <i>N</i> )-3-methyl-cyclopentadienyl-κ <i>C</i> )(η <sup>5</sup> -cyclopentadienyl) ferrocene]] digold(II) ( <b>IndFOMeAu(II)Cl</b> ) ..... | 25 |

|                                                                                                                                                                                                                                                             |    |
|-------------------------------------------------------------------------------------------------------------------------------------------------------------------------------------------------------------------------------------------------------------|----|
| Dichlorobis[ $\mu$ -[( $\eta^5$ -( <i>S,S</i> <sub>p</sub> )-2-(4',5'-diphenyl-4',5'-dihydro-2'-oxazolyl- $\kappa$ N)-3-methyl-cyclopentadienyl- $\kappa$ C)( $\eta^5$ -cyclopentadienyl) ferrocene]] digold(II) ( <b>Ph<sub>2</sub>FOMeAu(II)Cl</b> )..... | 26 |
| Dibromobis[ $\mu$ -[( $\eta^5$ -( <i>S,R</i> <sub>p</sub> )-2-(4'-isopropyl-4',5'-dihydro-2'-oxazolyl- $\kappa$ N)-3-methyl-cyclopentadienyl- $\kappa$ C1)( $\eta^5$ -cyclopentadienyl) ferrocene]] digold(II) ( <b>iPrFOMeAu(II)Br</b> ) .....             | 27 |
| Diiodobis[ $\mu$ -[( $\eta^5$ -( <i>S,R</i> <sub>p</sub> )-2-(4'-isopropyl-4',5'-dihydro-2'-oxazolyl- $\kappa$ N)-3-methyl-cyclopentadienyl- $\kappa$ C1)( $\eta^5$ -cyclopentadienyl) ferrocene]] digold(II) ( <b>iPrFOMeAu(II)I</b> ).....                | 28 |
| ( <i>S,R<sub>p</sub></i> , <i>S,R<sub>p</sub></i> )-2,2'-Bis[(4-Isopropyl-4,5-dihydro-2-oxazolyl)-3-methyl] 1,1'-biferrocenyl ( <b>(iPrFOMe)<sub>2</sub></b> )                                                                                              | 29 |
| Diacetatobis[ $\mu$ -[( $\eta^5$ -( <i>S,R</i> <sub>p</sub> )-2-(4'-isopropyl-4',5'-dihydro-2'-oxazolyl- $\kappa$ N)-3-methyl-cyclopentadienyl- $\kappa$ C1)( $\eta^5$ -cyclopentadienyl) ferrocene]] digold(II) ( <b>iPrFOMeAu(II)OAc</b> ) .....          | 30 |
| UV-Vis Spectra .....                                                                                                                                                                                                                                        | 31 |
| CD Spectra .....                                                                                                                                                                                                                                            | 32 |

# NMR Spectra

## (4*R*,5*S*)-(4,5-*5H*-Indeno[1,2-*d*]-4,5-dihydro-2-oxazolyl) ferrocene (IndFO)

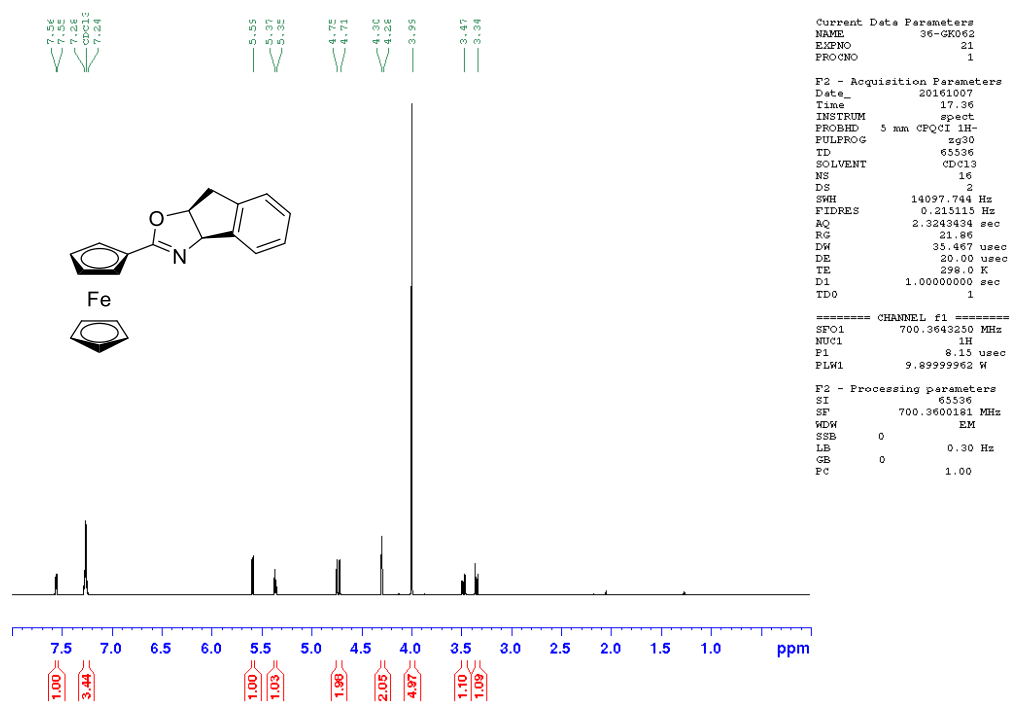

Figure S1m  $^1\text{H}$  NMR spectrum at 700 MHz of Compound IndFO in  $\text{CDCl}_3$ .

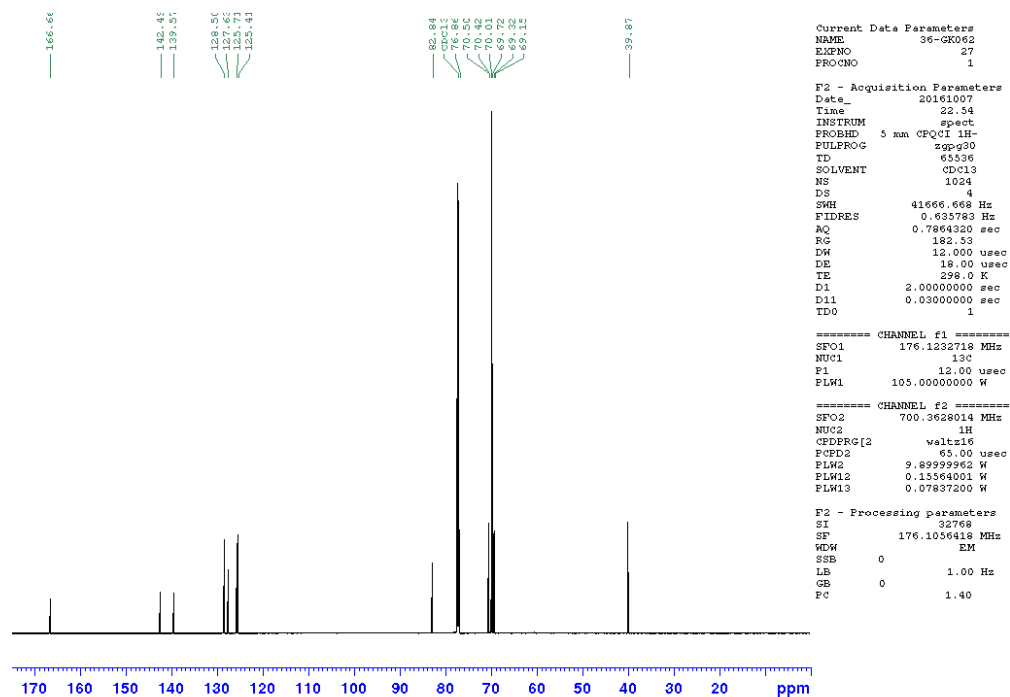

Figure S2  $^{13}\text{C}$   $\{^1\text{H}\}$  NMR spectrum at 175 MHz of Compound IndFO in  $\text{CDCl}_3$ .

**(4*R*,5*S*,*S<sub>p</sub>*)-(4,5-*5H*-Indeno[1,2-*d*]-4,5-dihydro-2-oxazolyl)-2-methyl ferrocene (IndFOMe)**

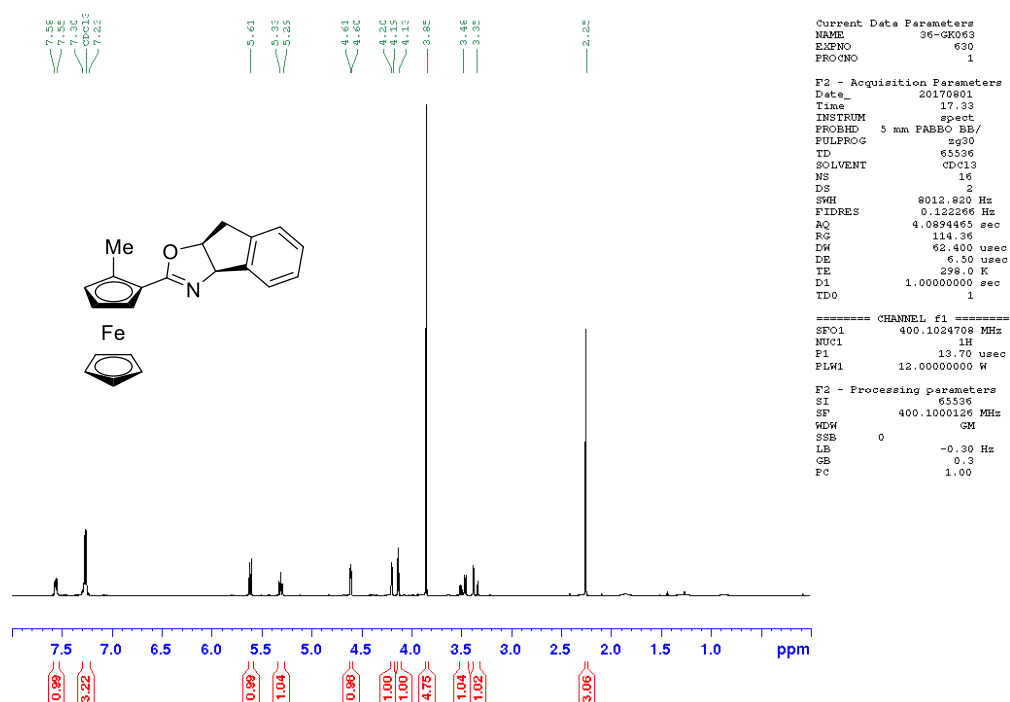

Figure S3 <sup>1</sup>H NMR spectrum at 400 MHz of Compound **IndFOMe** in CDCl<sub>3</sub>.

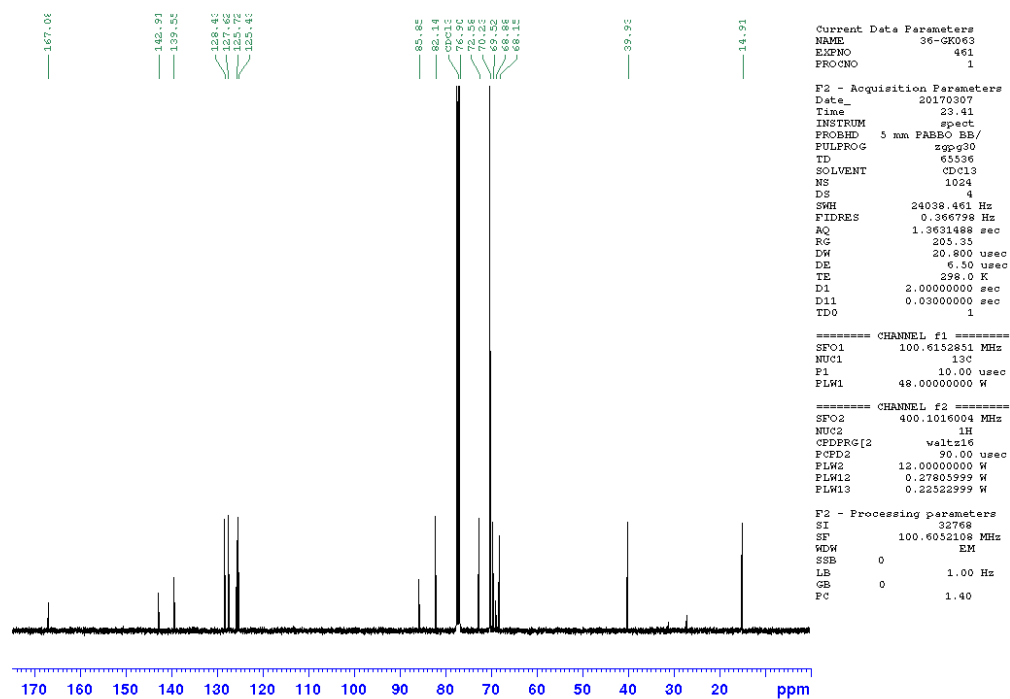

Figure S4 <sup>13</sup>C {<sup>1</sup>H} NMR spectrum at 100 MHz of Compound **IndFOMe** in CDCl<sub>3</sub>.

(4*R*,5*R*,*S*<sub>p</sub>)-(4,5-Diphenyl-4,5-dihydro-2-oxazolyl)-2-methyl ferrocene (Ph<sub>2</sub>FOMe)

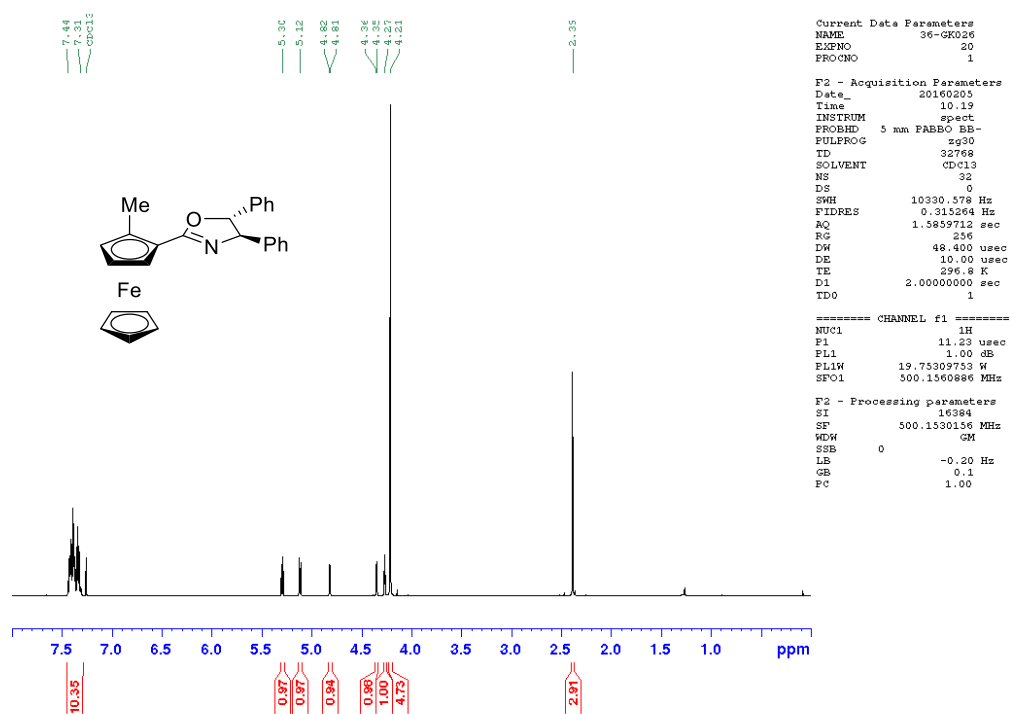

Figure S5 <sup>1</sup>H NMR spectrum at 500 MHz of Compound Ph<sub>2</sub>FOMe in CDCl<sub>3</sub>.

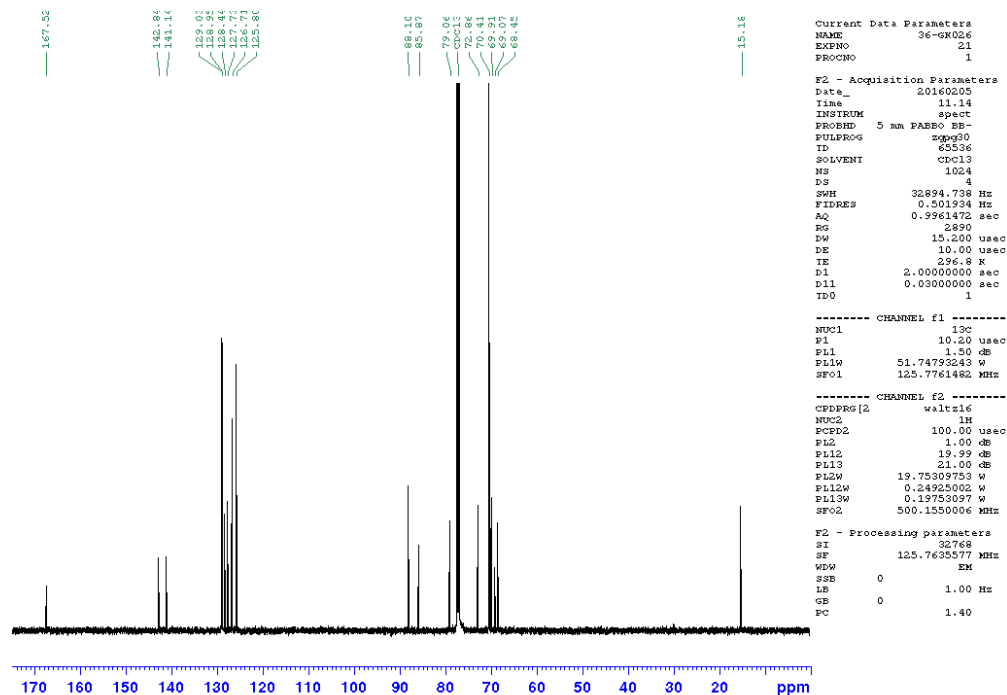

Figure S6 <sup>13</sup>C {<sup>1</sup>H} NMR spectrum at 125 MHz of Compound Ph<sub>2</sub>FOMe in CDCl<sub>3</sub>.

**(S)-(4-Isopropyl-4,5-dihydro-2-oxazolyl)-2,5-dimethyl ferrocene (*i*PrFOMe<sub>2</sub>)**

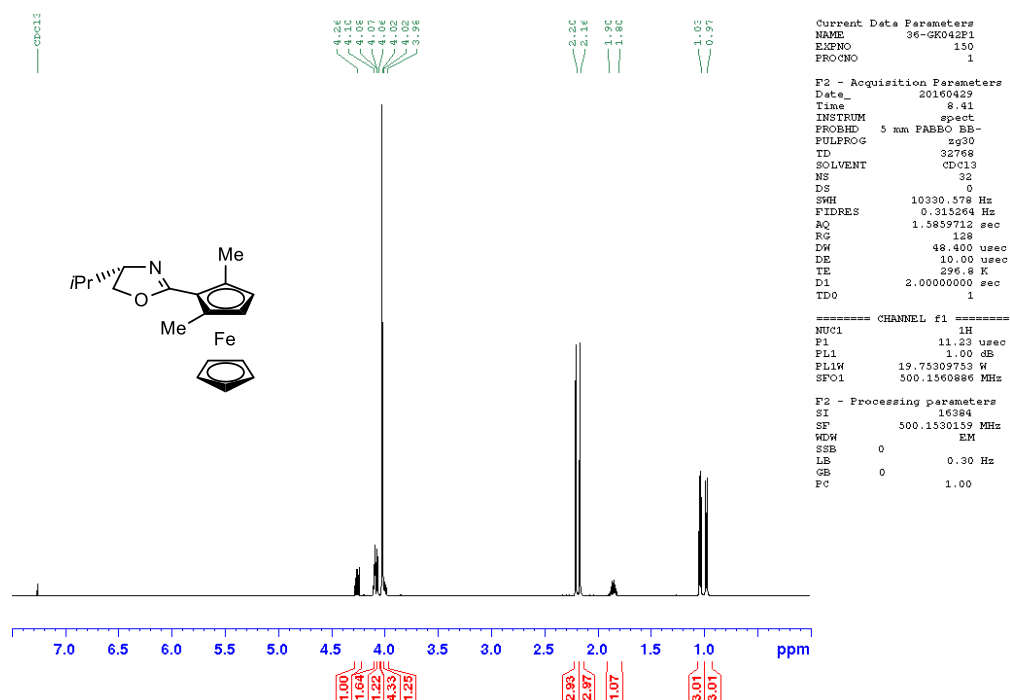

**Figure S7** <sup>1</sup>H NMR spectrum at 500 MHz of Compound *i*PrFOMe<sub>2</sub> in CDCl<sub>3</sub>.

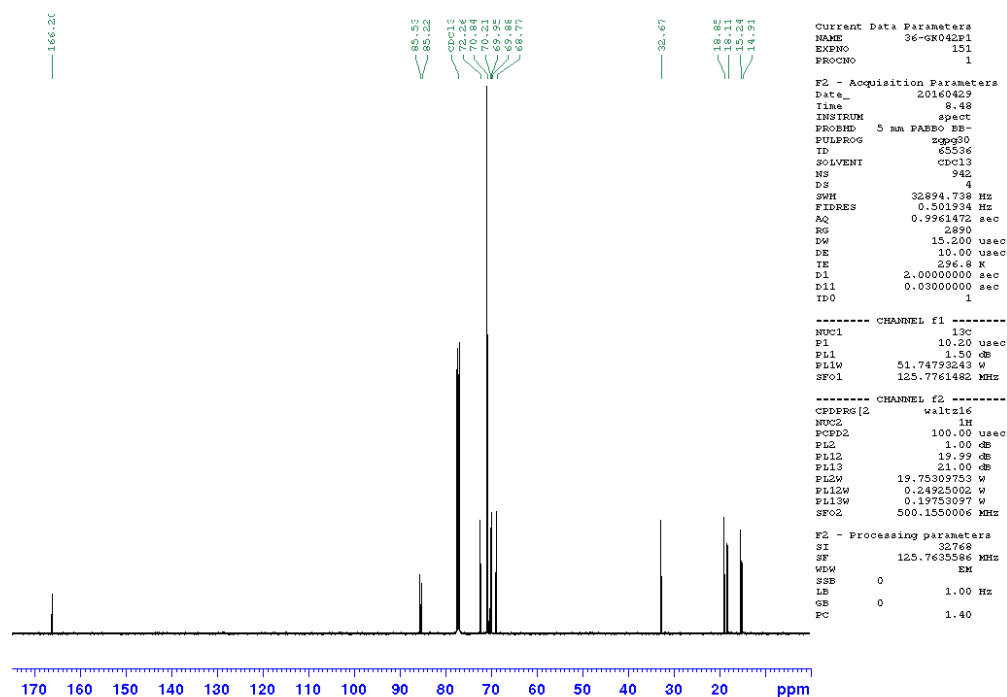

**Figure S8** <sup>13</sup>C {<sup>1</sup>H} NMR spectrum at 125 MHz of Compound *i*PrFOMe<sub>2</sub> in CDCl<sub>3</sub>.

**(*S,S*)-4-(4-Isopropyl-4,5-dihydro-2-oxazolyl)-2-trimethylsilyl-5-methyl ferrocene (*i*PrFOTMSMe)**

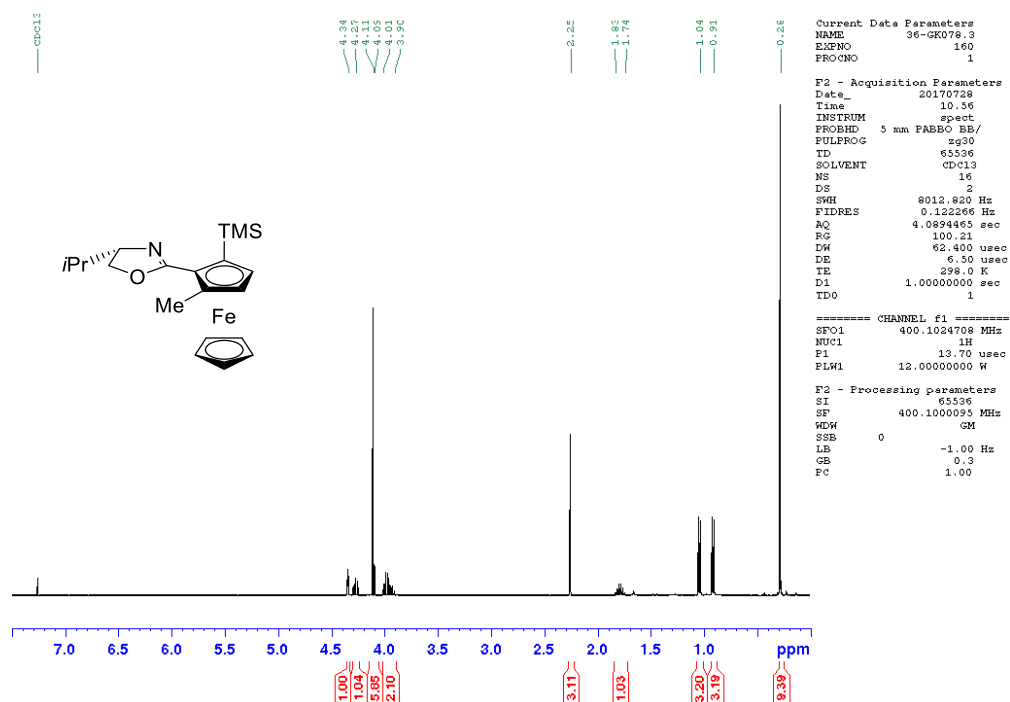

**Figure S9**  $^1\text{H}$  NMR spectrum at 400 MHz of Compound *i*PrFOTMSMe in  $\text{CDCl}_3$ .

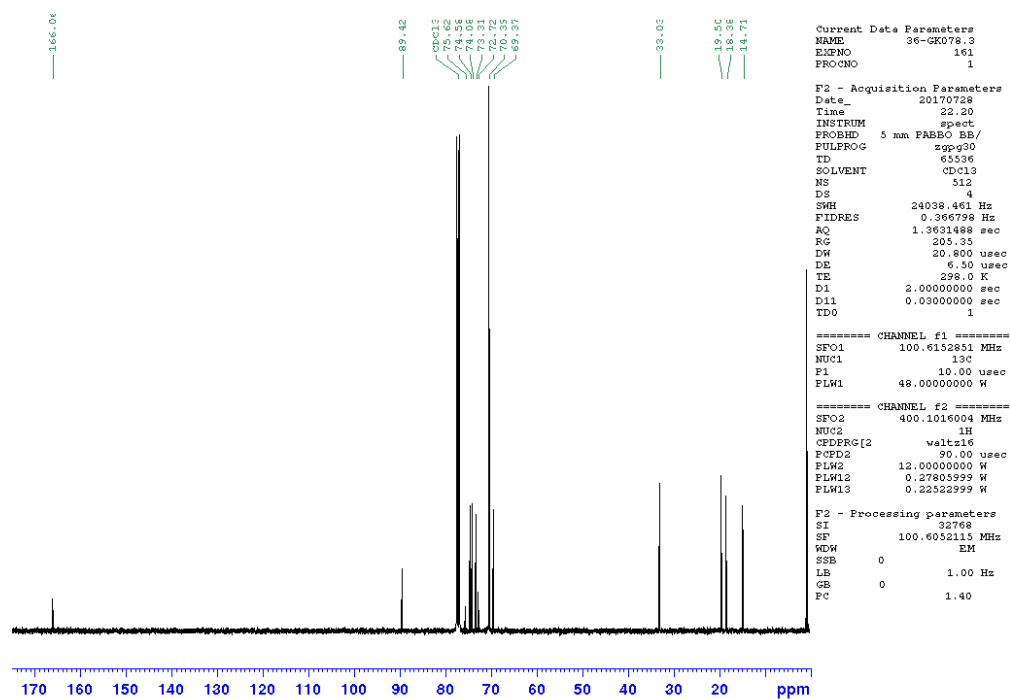

**Figure S10**  $^{13}\text{C}$   $\{^1\text{H}\}$  NMR spectrum at 100 MHz of Compound *i*PrFOTMSMe in  $\text{CDCl}_3$ .



**(S)-(4-Tert-butyl-4,5-dihydro-2-oxazolyl)-2,5-dimethyl ferrocene (tBuFOMe<sub>2</sub>)**

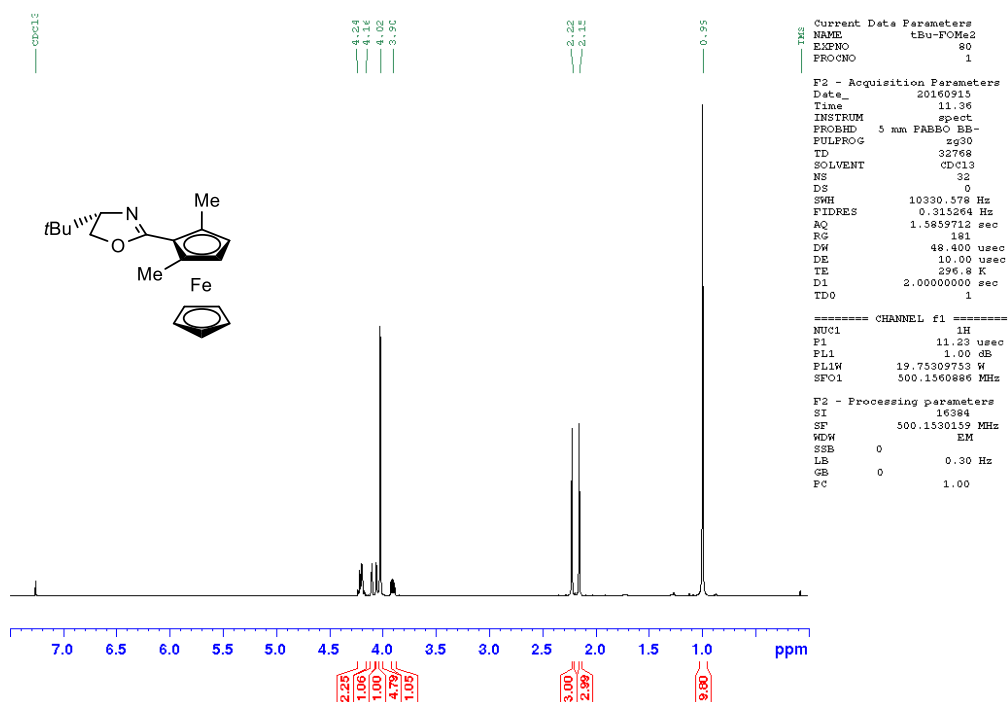

**Figure S11** <sup>1</sup>H NMR spectrum at 500 MHz of Compound tBuFOMe<sub>2</sub> in CDCl<sub>3</sub>.

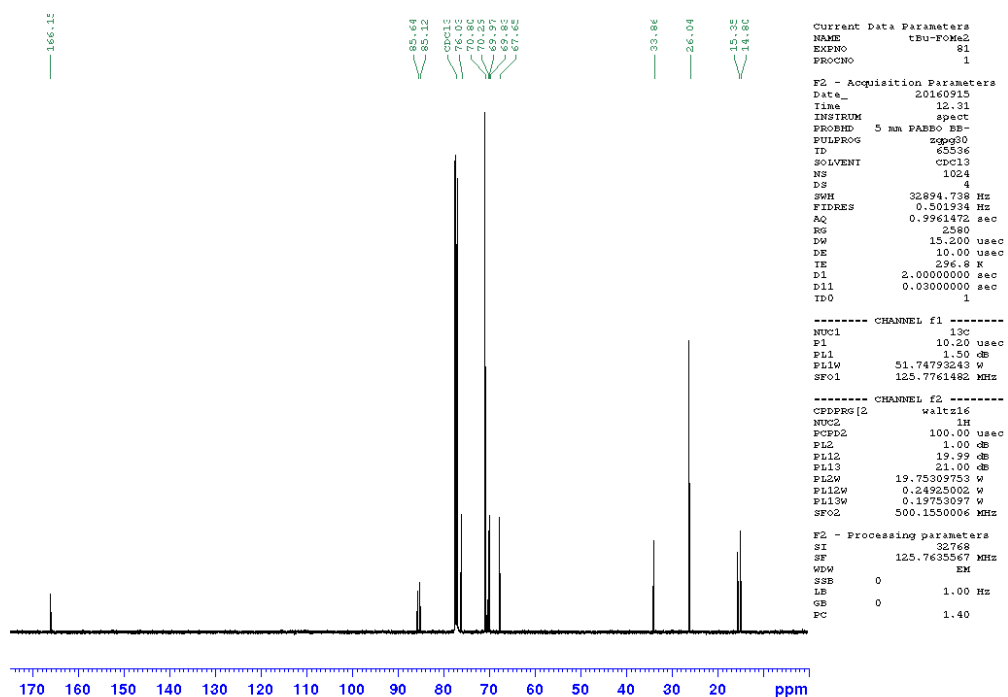

**Figure S12** <sup>13</sup>C {<sup>1</sup>H} NMR spectrum at 125 MHz of Compound tBuFOMe<sub>2</sub> in CDCl<sub>3</sub>.

(4*R*,5*S*)-(4,5-*5H*-Indeno[1,2-*d*]-4,5-dihydro-2-oxazolyl)-2,5-dimethyl ferrocene (IndFOME<sub>2</sub>)

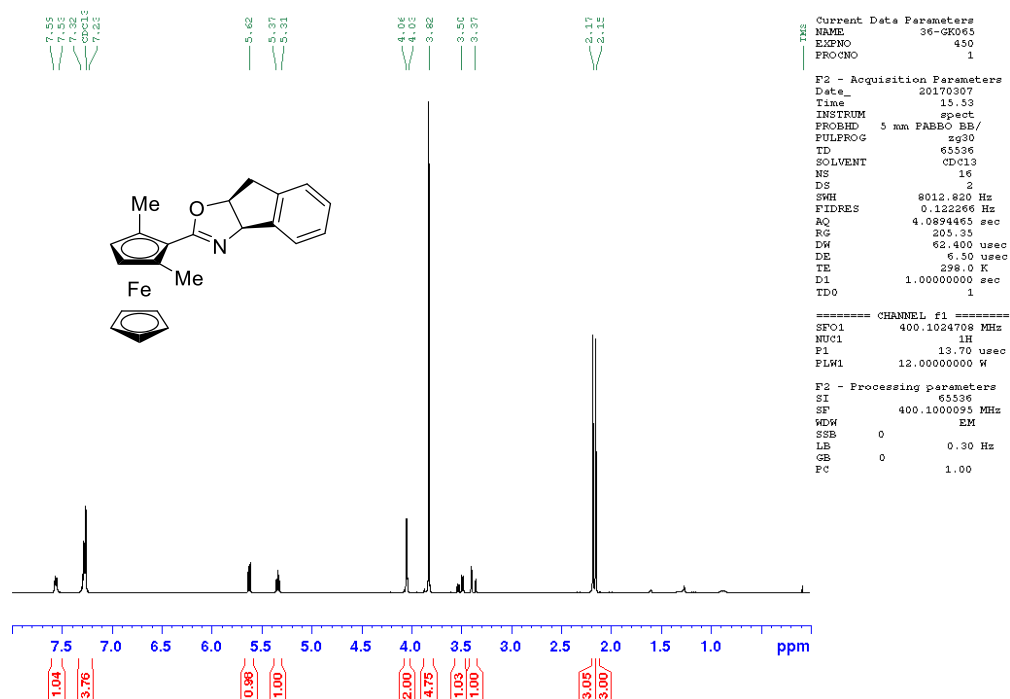

Figure S13 <sup>1</sup>H NMR spectrum at 400 MHz of Compound IndFOME<sub>2</sub> in CDCl<sub>3</sub>.

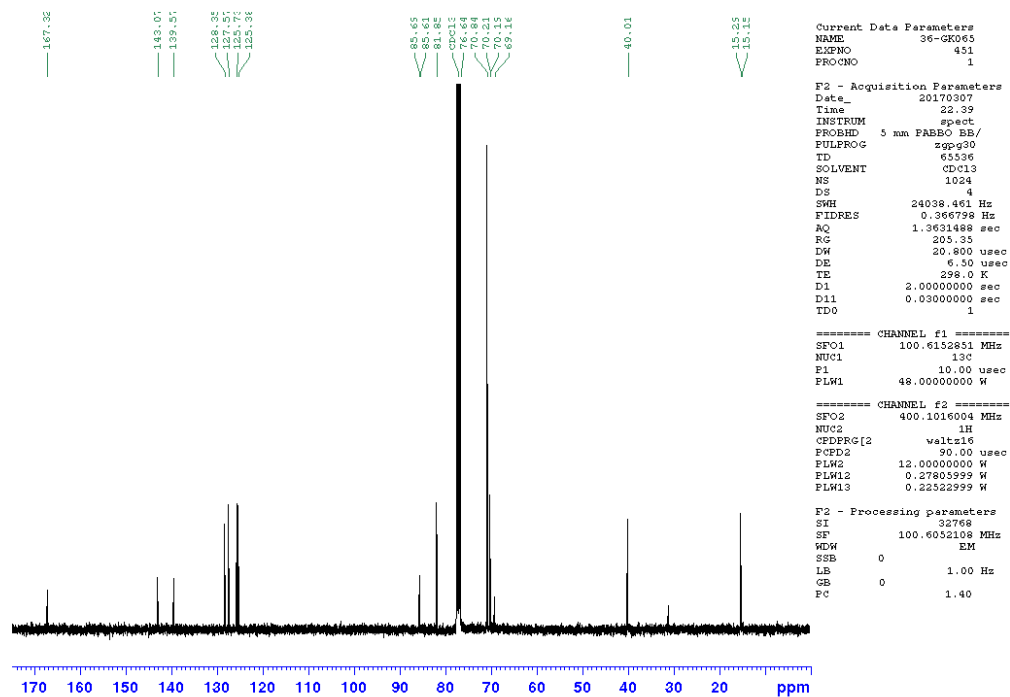

Figure S14 <sup>13</sup>C {<sup>1</sup>H} NMR spectrum at 100 MHz of Compound IndFOME<sub>2</sub> in CDCl<sub>3</sub>.

(4*R*,5*R*)-(4,5-Diphenyl-4,5-dihydro-2-oxazolyl)-2,5-dimethyl ferrocene (**Ph<sub>2</sub>FOMe<sub>2</sub>**)

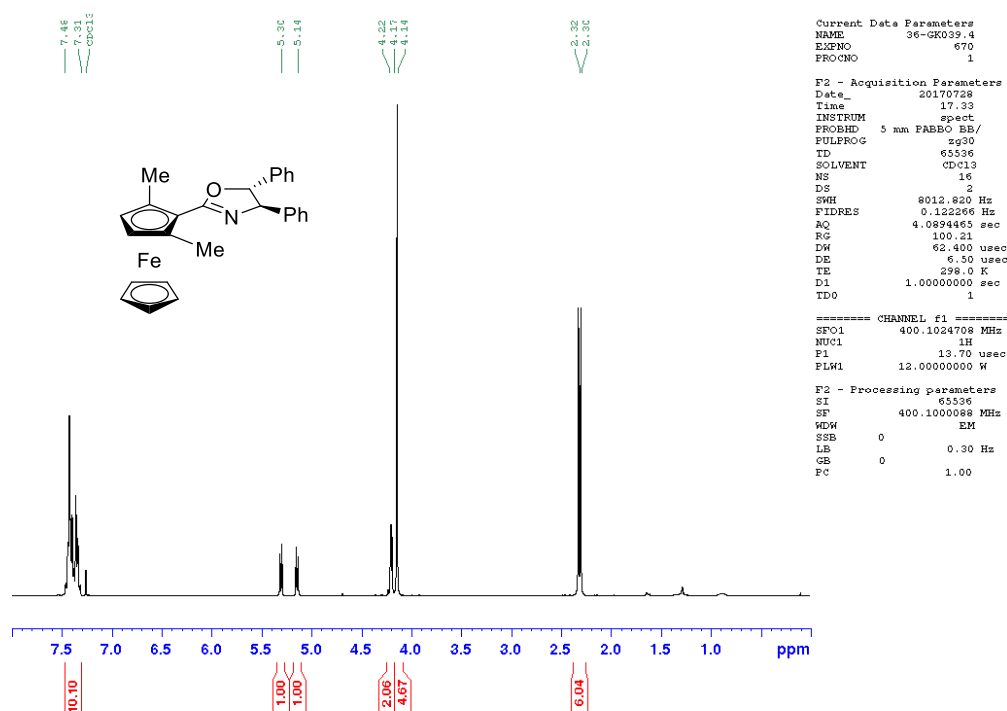

Figure S15 <sup>1</sup>H NMR spectrum at 400 MHz of Compound **Ph<sub>2</sub>FOMe<sub>2</sub>** in CDCl<sub>3</sub>.

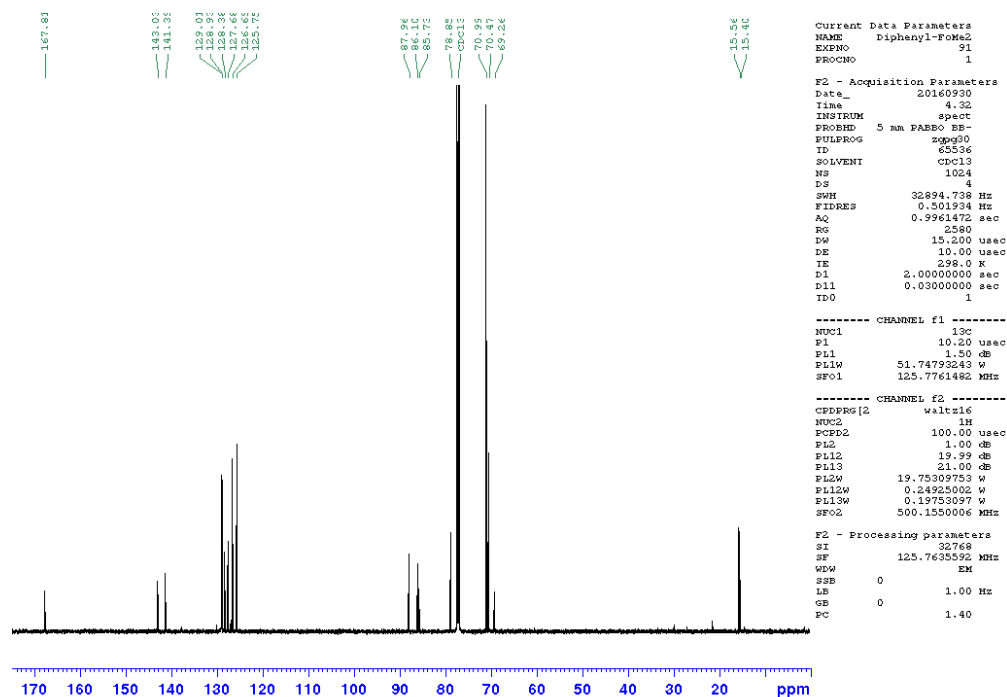

Figure S16 <sup>13</sup>C {<sup>1</sup>H} NMR spectrum at 125 MHz of Compound **Ph<sub>2</sub>FOMe<sub>2</sub>** in CDCl<sub>3</sub>.

**Bis[ $\mu$ -[( $\eta^5$ -( $S,R_p$ )-2-(4'-isopropyl-4',5'-dihydro-2'-oxazolyl- $\kappa N$ )-cyclopentadienyl- $\kappa C$ )( $\eta^5$ -cyclopentadienyl) ferrocene]] digold(I) (( $R_p$ )- $i$ PrFOAu(I))**

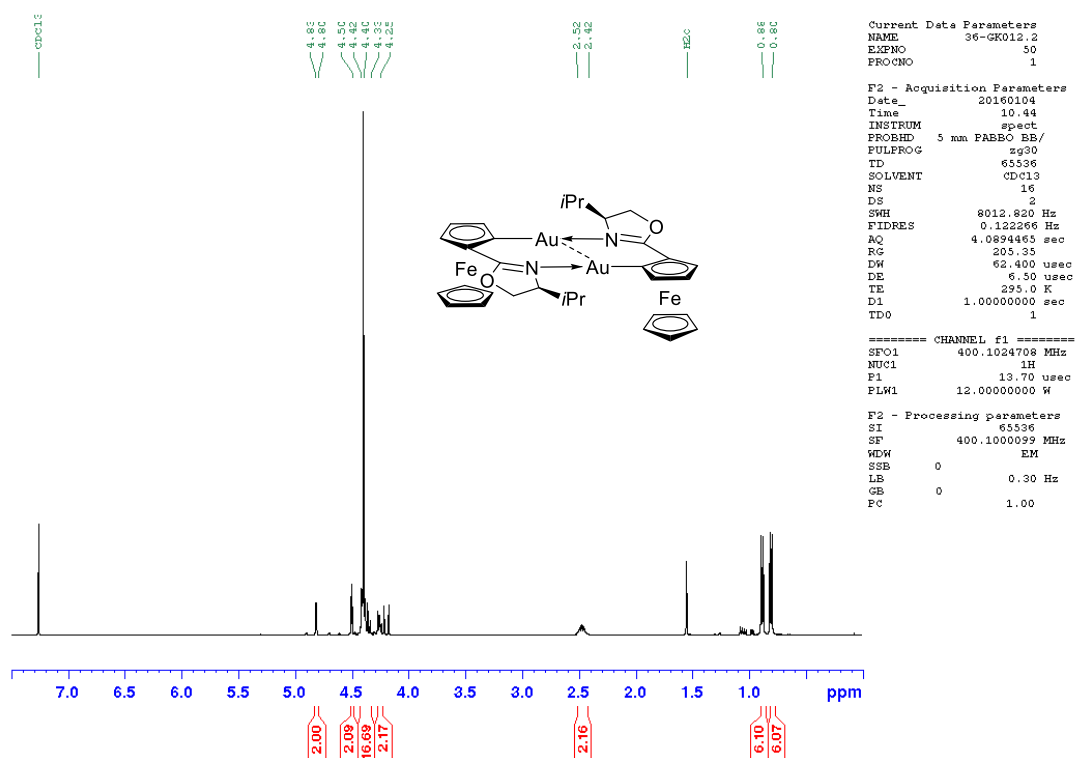

**Figure S17**  $^1\text{H}$  NMR spectrum at 400 MHz of Compound ( $R_p$ )- $i$ PrFOAu(I) in  $\text{CDCl}_3$ .

**Bis[ $\mu$ -[( $\eta^5$ -(*S,R*)-2-(4'-isopropyl-4',5'-dihydro-2'-oxazolyl- $\kappa$ N))-3-methyl-cyclopentadienyl- $\kappa$ C)( $\eta^5$ -cyclopentadienyl) ferrocene]] digold(I) (*i*PrFOMeAu(I))**

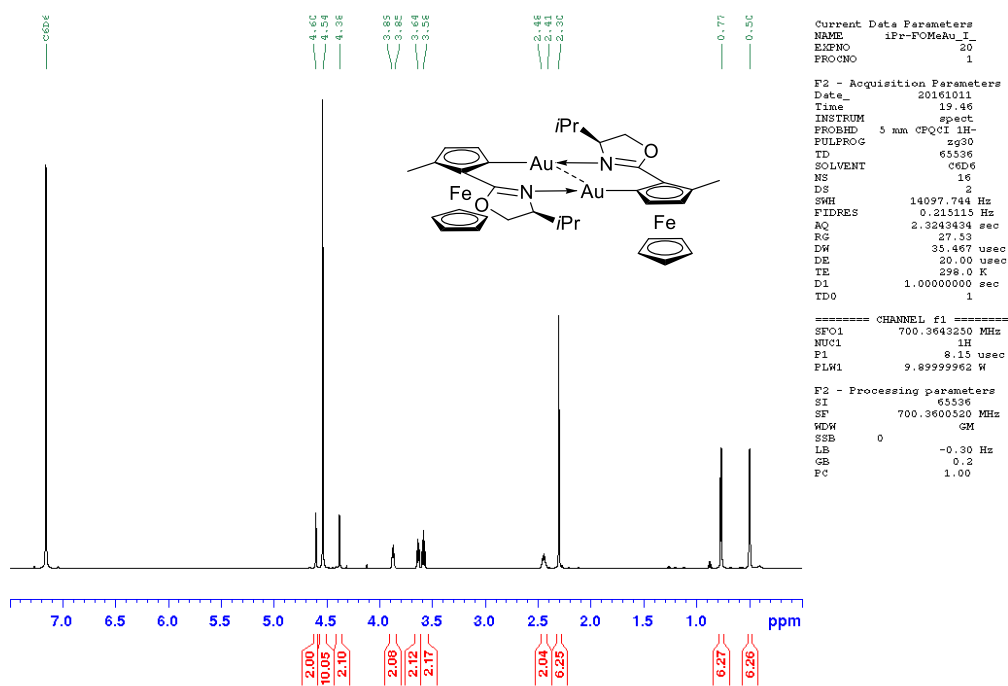

**Figure S18**  $^1\text{H}$  NMR spectrum at 700 MHz of Compound *i*PrFOMeAu(I) in  $\text{C}_6\text{D}_6$ .

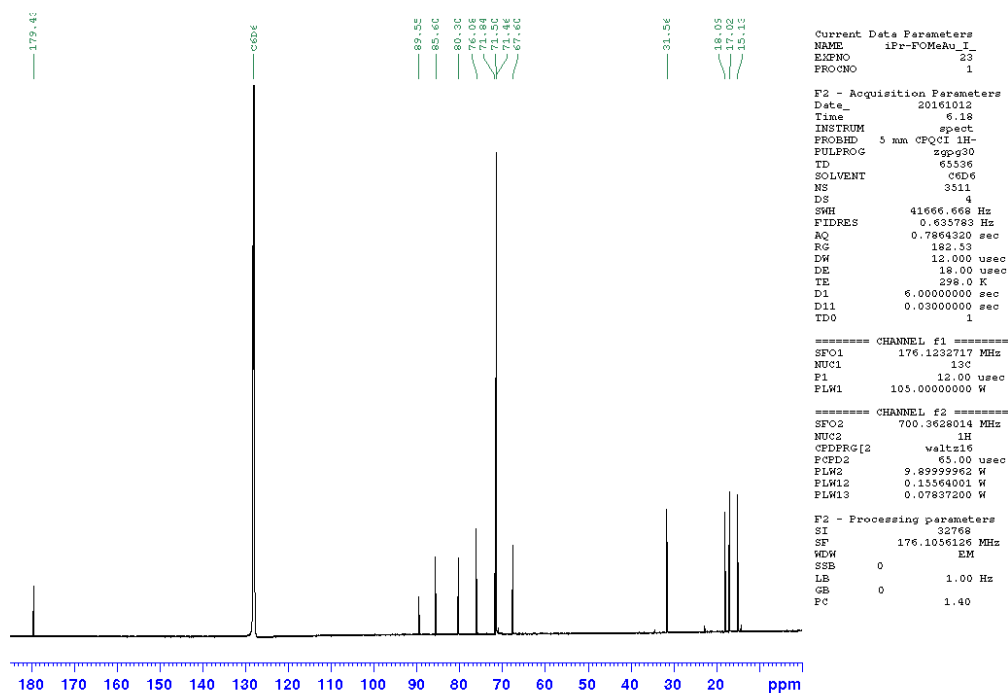

**Figure S19**  $^{13}\text{C}$   $\{^1\text{H}\}$  NMR spectrum at 175 MHz of Compound *i*PrFOMeAu(I) in  $\text{C}_6\text{D}_6$ .

**Bis[ $\mu$ -[( $\eta^5$ -(*S,R*<sub>p</sub>)-2-(4'-isopropyl-4',5'-dihydro-2'-oxazolyl- $\kappa$ N)-3-trimethylsilyl-cyclopentadienyl- $\kappa$ C)( $\eta^5$ -cyclopentadienyl) ferrocene]] digold(I) (*i*PrFOTMSAu(I))**

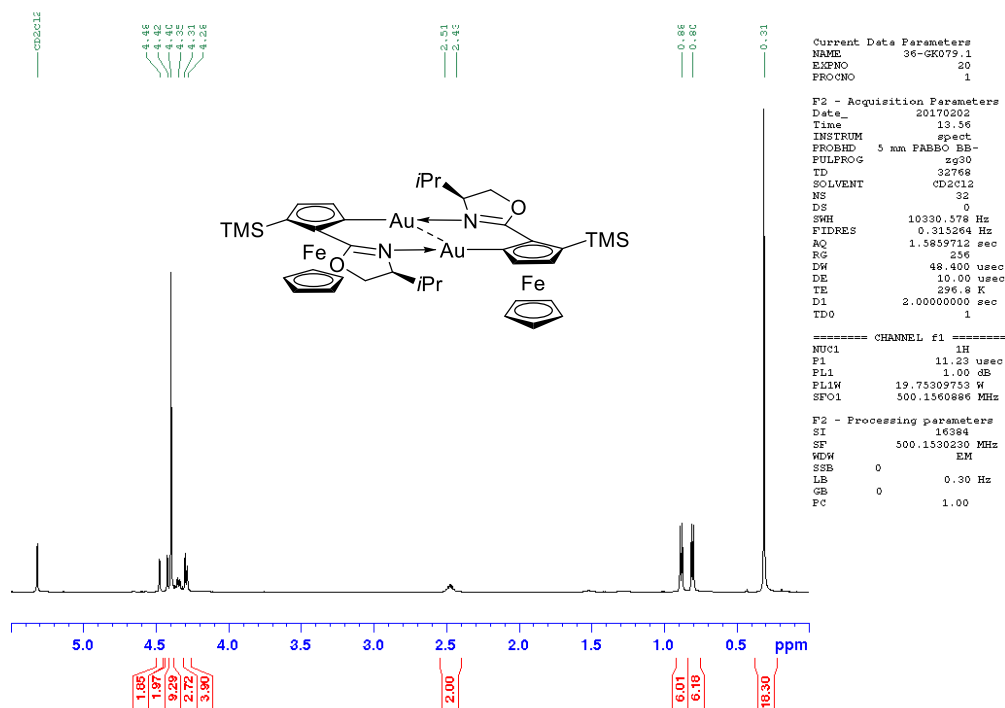

**Figure S20**  $^1\text{H}$  NMR spectrum at 500 MHz of Compound *i*PrFOTMSAu(I) in  $\text{CD}_2\text{Cl}_2$ .

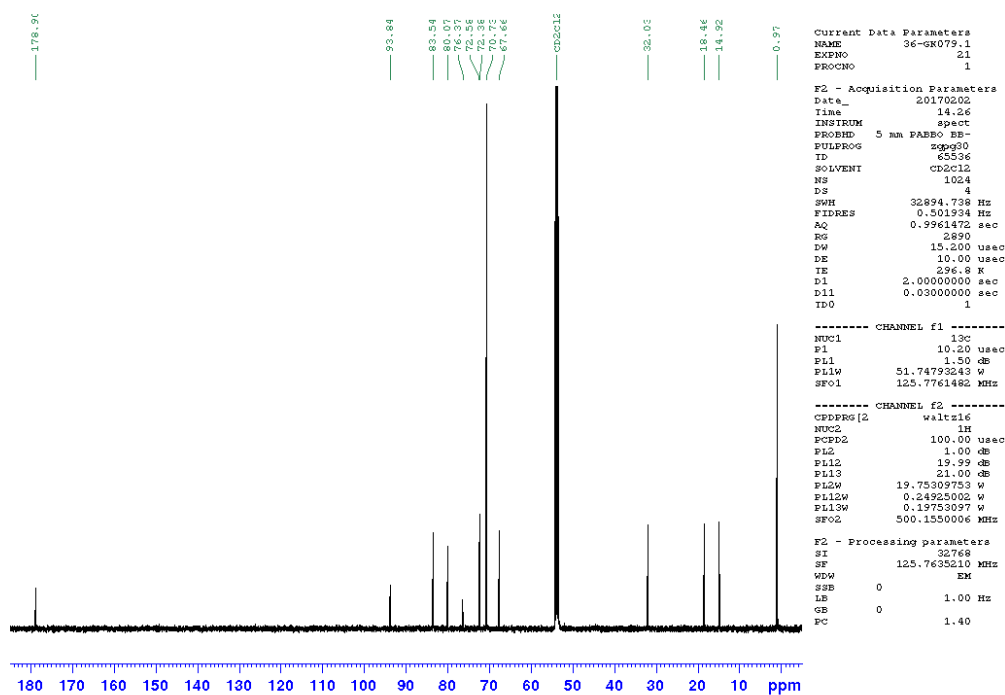

**Figure S21**  $^{13}\text{C}$   $\{^1\text{H}\}$  NMR spectrum at 125 MHz of Compound *i*PrFOTMSAu(I) in  $\text{CD}_2\text{Cl}_2$ .

**Bis[ $\mu$ -[( $\eta^5$ -(*S,R\_p*)-2-(4'-*tert*-butyl-4',5'-dihydro-2'-oxazolyl- $\kappa$ N)-3-methyl-cyclopentadienyl- $\kappa$ C)( $\eta^5$ -cyclopentadienyl) ferrocene]] digold(I) (*t*BuFOMeAu(I))**

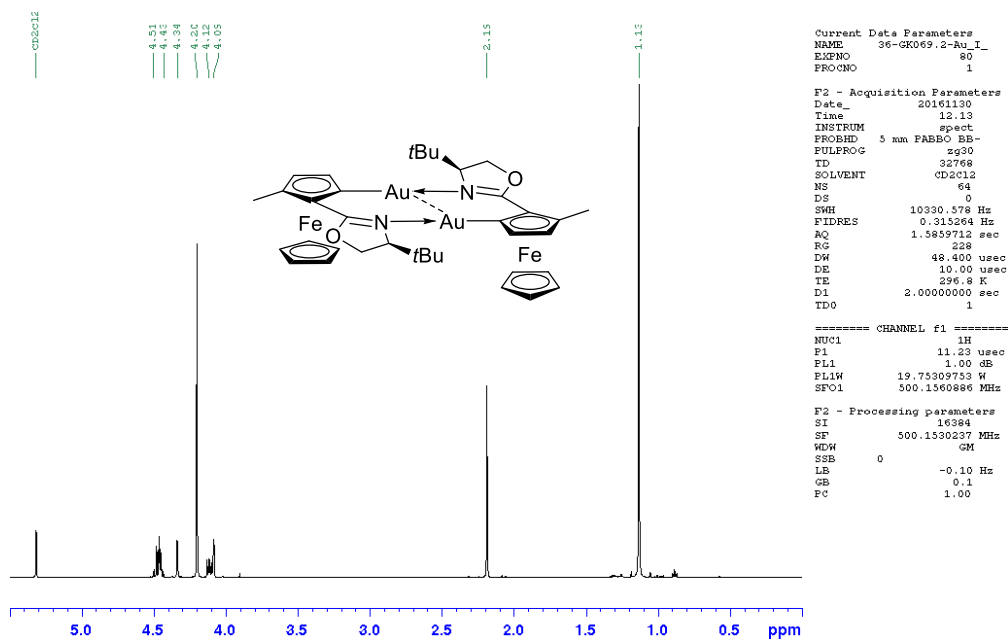

**Figure S22**  $^1\text{H}$  NMR spectrum at 500 MHz of Compound *t*BuFOMeAu(I) in  $\text{CD}_2\text{Cl}_2$ .

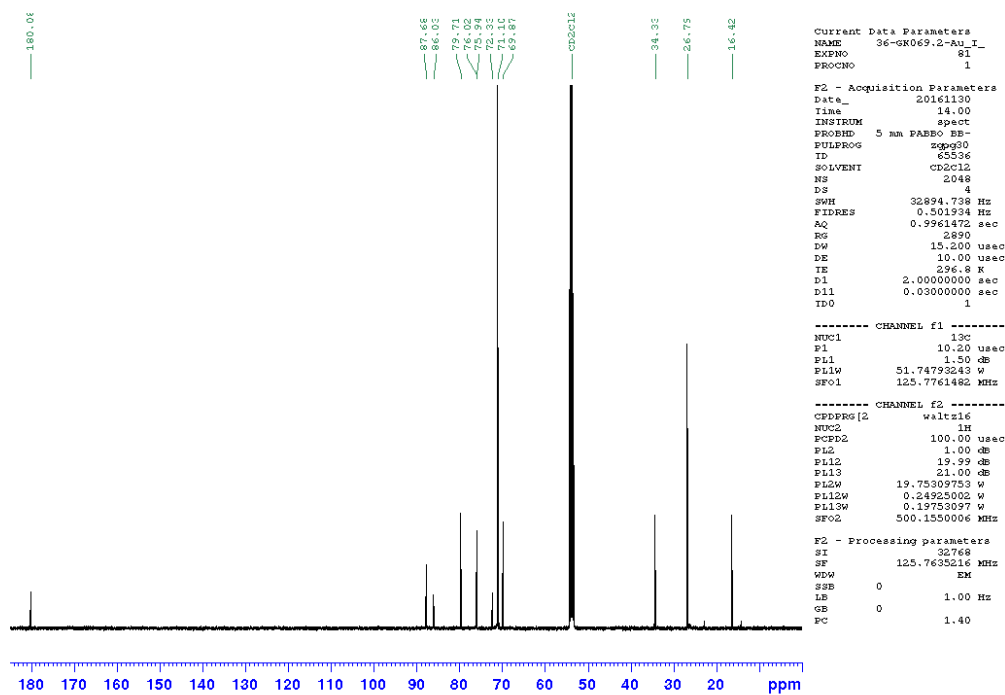

**Figure S23**  $^{13}\text{C}$   $\{^1\text{H}\}$  NMR spectrum at 125 MHz of Compound *t*BuFOMeAu(I) in  $\text{CD}_2\text{Cl}_2$ .

**Bis[ $\mu$ -[( $\eta^5$ -(*S,S*)-2-(4',5'-5'*H*-Indeno[1,2-*d*]-4',5'-dihydro-2'-oxazolyl- $\kappa$ N)-3-methylcyclopentadienyl- $\kappa$ C)( $\eta^5$ -cyclopentadienyl) ferrocene]] digold(I) (IndFOMeAu(I))**

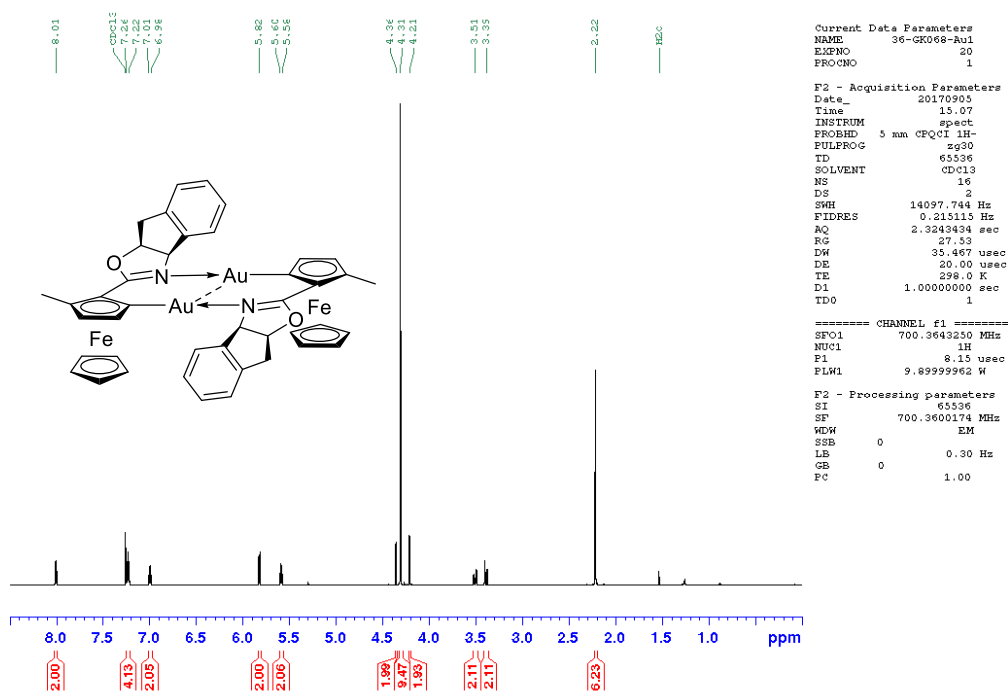

**Figure S24**  $^1\text{H}$  NMR spectrum at 700 MHz of Compound **IndFOMeAu(I)** in  $\text{CDCl}_3$ .

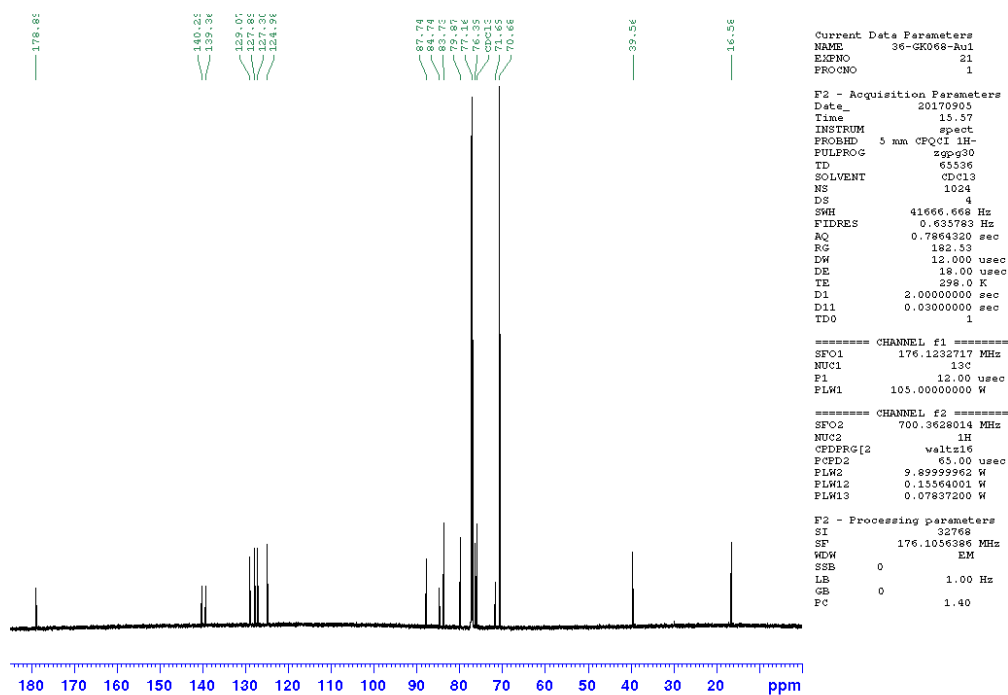

**Figure S25**  $^{13}\text{C}$   $\{^1\text{H}\}$  NMR spectrum at 175 MHz of Compound **IndFOMeAu(I)** in  $\text{CDCl}_3$ .



**Bis[ $\mu$ -[( $\eta^5$ -(*S,S*)-2-(4',5'-diphenyl-4',5'-dihydro-2'-oxazolyl- $\kappa$ N)-3-methyl-cyclopentadienyl- $\kappa$ C)( $\eta^5$ -cyclopentadienyl) ferrocene]] digold(I) (Ph<sub>2</sub>FOMeAu(I))**

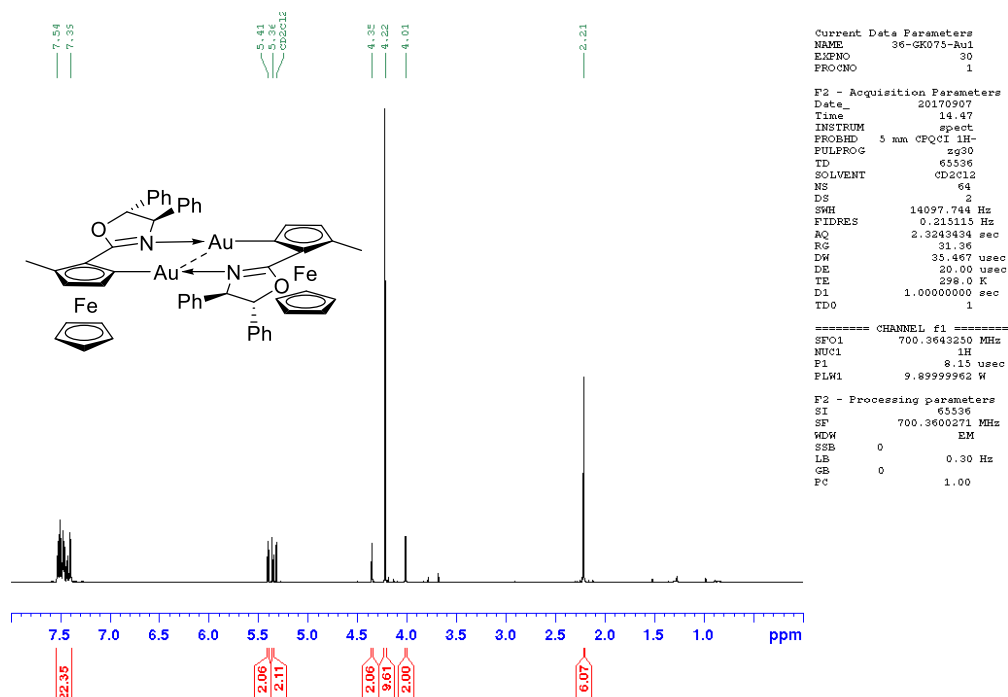

**Figure S26** <sup>1</sup>H NMR spectrum at 700 MHz of Compound **Ph<sub>2</sub>FOMeAu(I)** in CD<sub>2</sub>Cl<sub>2</sub>.

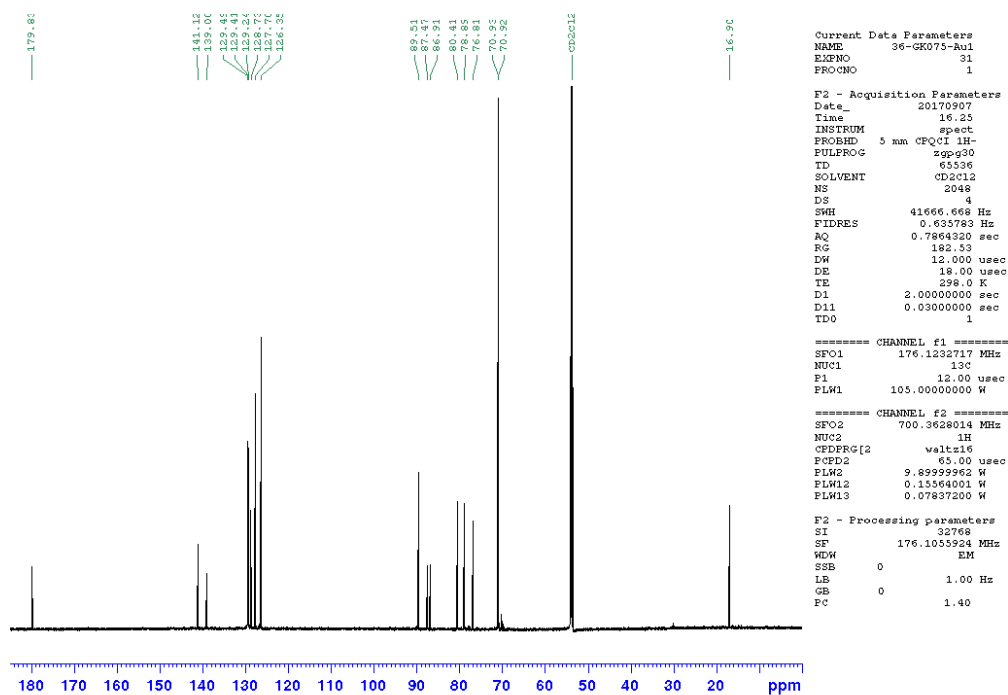

**Figure S27** <sup>13</sup>C {<sup>1</sup>H} NMR spectrum at 175 MHz of Compound **Ph<sub>2</sub>FOMeAu(I)** in CD<sub>2</sub>Cl<sub>2</sub>.

***rac*-Bis[ $\mu$ -[( $\eta^5$ -2-(2'-oxazolyl- $\kappa$ N)-3-methyl-cyclopentadienyl- $\kappa$ C)( $\eta^5$ -cyclopentadienyl)ferrocene]] digold(I) ( $H_2FOMeAu(I)$ )**

Due to fast decomposition the NMR spectra are not perfectly pure and an absolute proof of purity was not possible. Especially the  $^1H$ -NMR is quite complex.

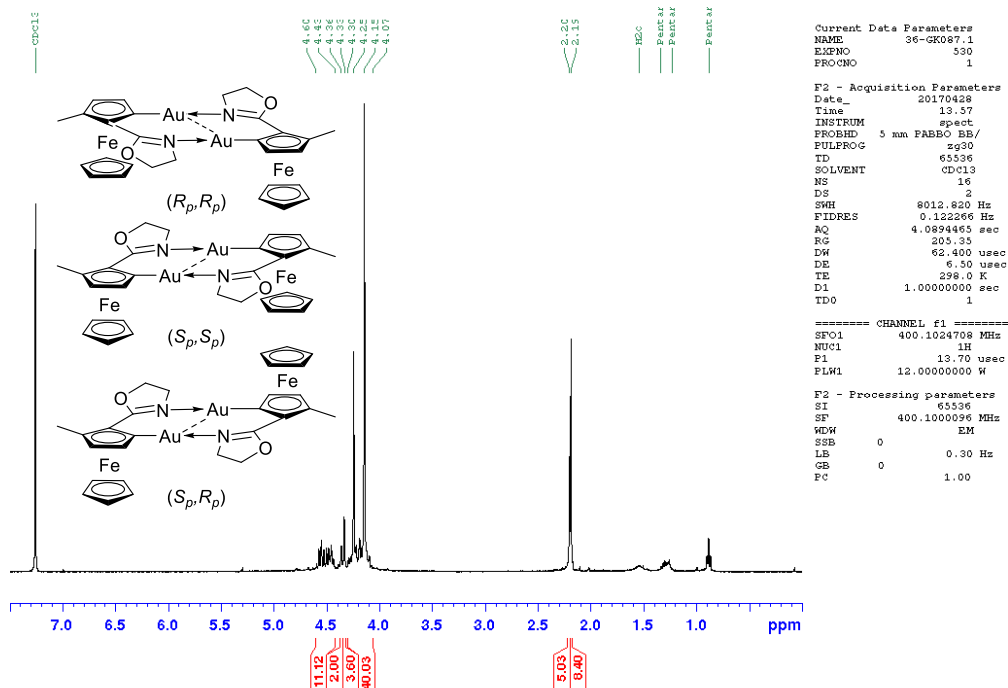

**Figure S28**  $^1H$  NMR spectrum at 400 MHz of Compound  $H_2FOMeAu(I)$  in  $CDCl_3$ .

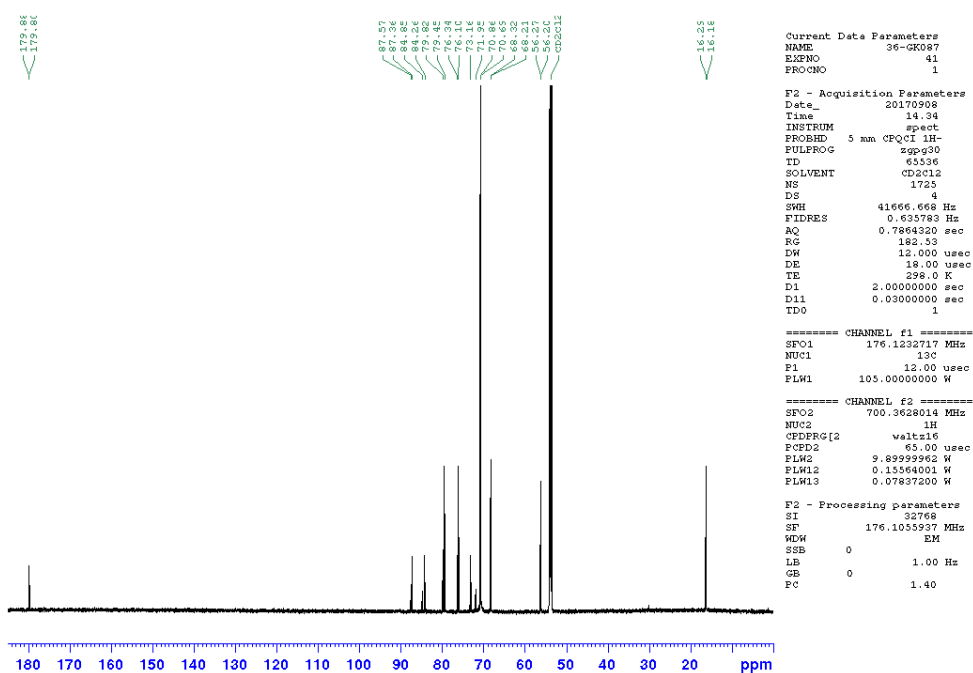

***rac*-Bis[ $\mu$ -[( $\eta^5$ -2-(4',5'-Dihydro-4',4'-dimethyl-2'-oxazolyl- $\kappa$ N)-3-methyl-cyclopentadienyl- $\kappa$ C)( $\eta^5$ -cyclopentadienyl) ferrocene]] digold(I) (Me<sub>2</sub>FOMeAu(I))**

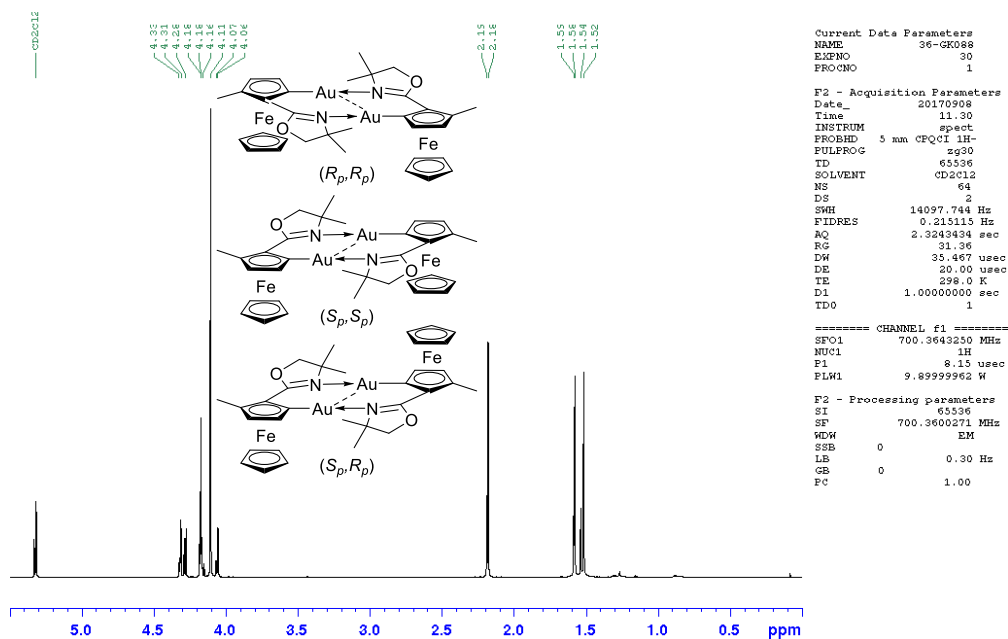

**Figure S30** <sup>1</sup>H NMR spectrum at 700 MHz of Compound Me<sub>2</sub>FOMeAu(I) in CD<sub>2</sub>Cl<sub>2</sub>.

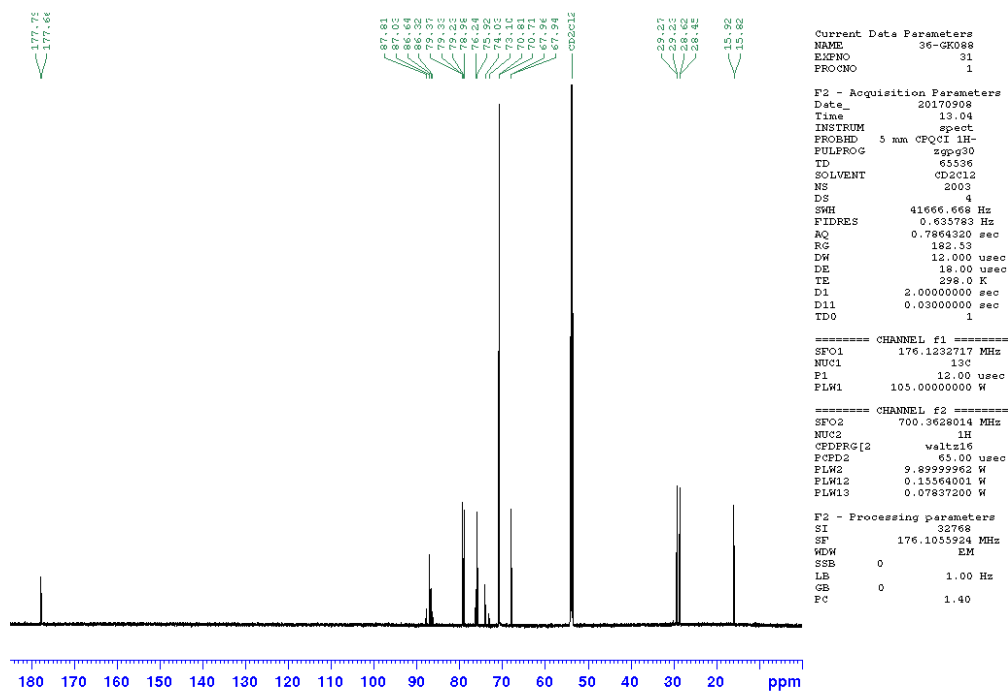

**Figure S31** <sup>13</sup>C {<sup>1</sup>H} NMR spectrum at 175 MHz of Compound Me<sub>2</sub>FOMeAu(I) in CD<sub>2</sub>Cl<sub>2</sub>.

***rac*-Bis[ $\mu$ -[( $\eta^5$ -2-(2'-oxazolyl- $\kappa$ N)-cyclopentadienyl- $\kappa$ C)( $\eta^5$ -cyclopentadienyl) ferrocene]] digold(I) ( $H_2FOAu(I)$ )**

Due to fast decomposition the NMR spectra are not perfectly pure and an absolute proof of purity was not possible.

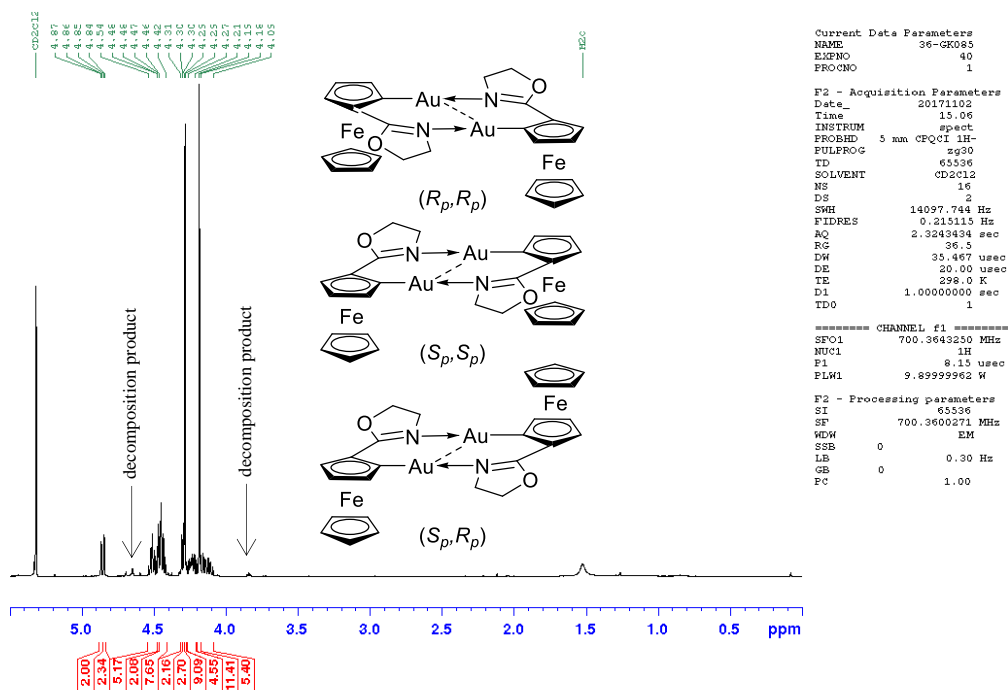

Figure S32  $^1H$  NMR spectrum at 700 MHz of Compound  $H_2FOAu(I)$  in  $CD_2Cl_2$ .

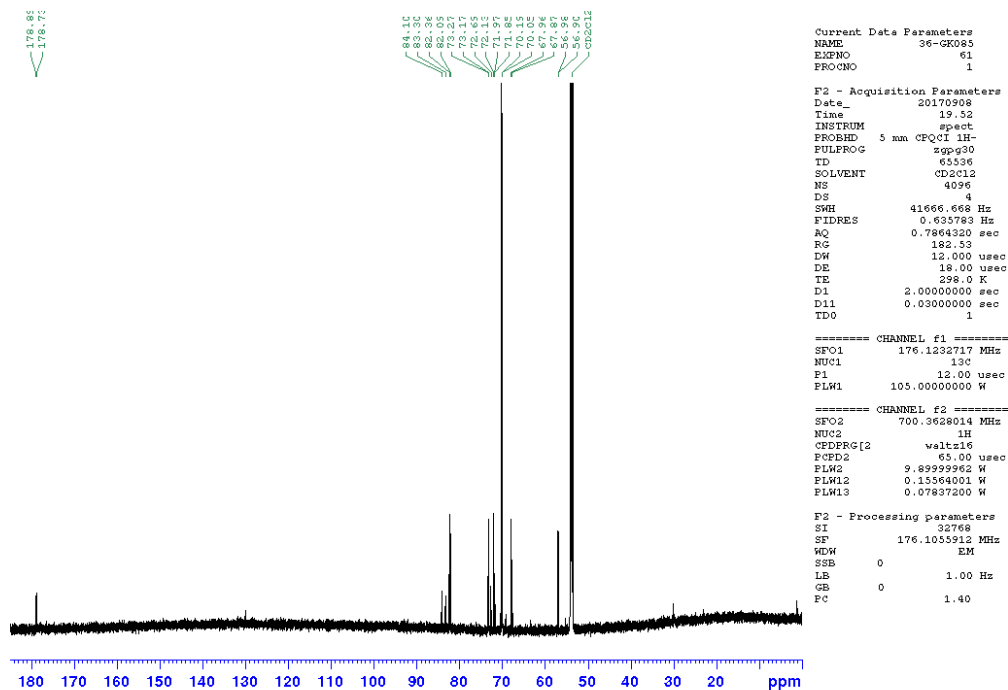

Figure S33  $^{13}C$   $\{^1H\}$  NMR spectrum at 175 MHz of Compound  $H_2FOAu(I)$  in  $CD_2Cl_2$ .

***rac*-Bis[ $\mu$ -[( $\eta^5$ -2-(4',5'-Dihydro-4',4'-dimethyl-2'-oxazolyl- $\kappa$ N)-cyclopentadienyl- $\kappa$ C)( $\eta^5$ -cyclopentadienyl) ferrocene]] digold(I) (Me<sub>2</sub>FOAu(I))**

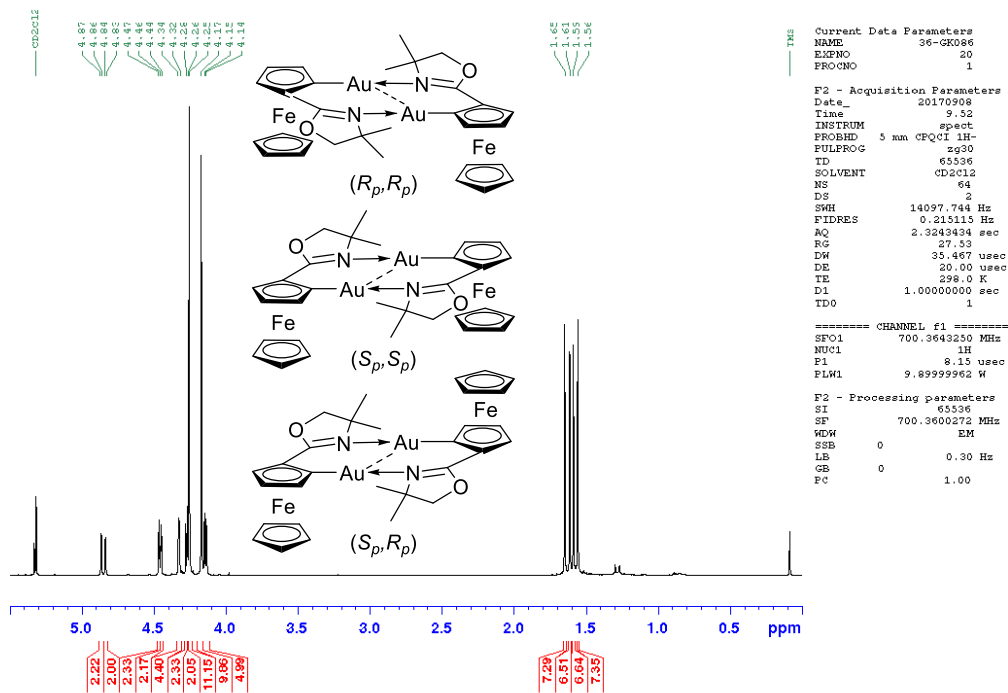

**Figure S34** <sup>1</sup>H NMR spectrum at 700 MHz of Compound Me<sub>2</sub>FOAu(I) in CD<sub>2</sub>Cl<sub>2</sub>.

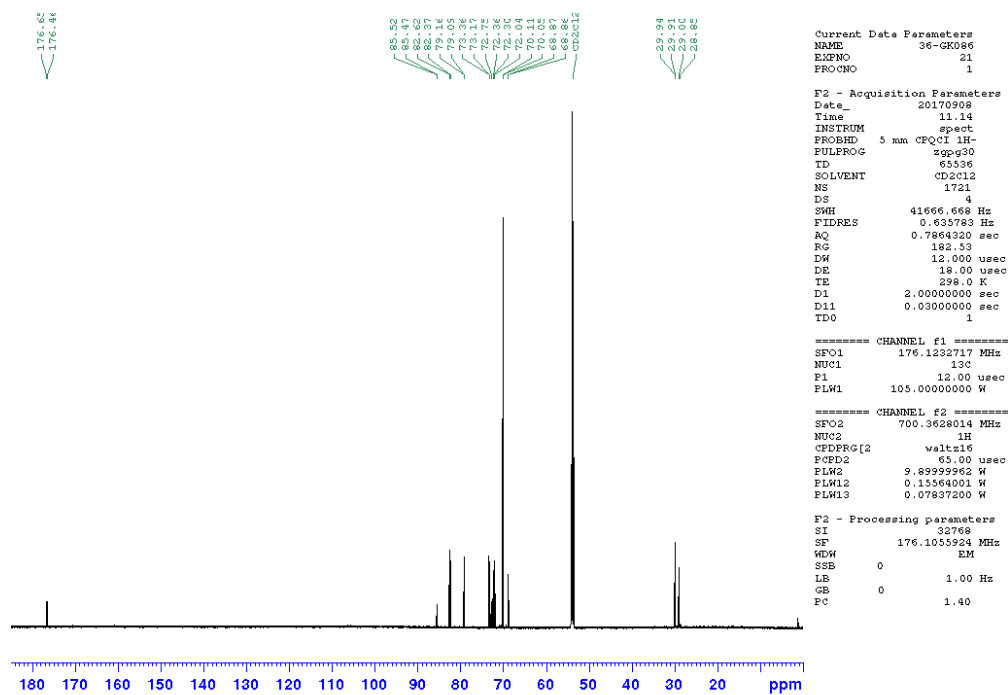

**Figure S35** <sup>13</sup>C {<sup>1</sup>H} NMR spectrum at 175 MHz of Compound Me<sub>2</sub>FOAu(I) in CD<sub>2</sub>Cl<sub>2</sub>.

Dichlorobis[ $\mu$ -[( $\eta^5$ -(*S,R*<sub>p</sub>)-2-(4'-isopropyl-4',5'-dihydro-2'-oxazolyl- $\kappa$ N)-3-methylcyclopentadienyl- $\kappa$ Cl)( $\eta^5$ -cyclopentadienyl) ferrocene]] digold(II) (*i*PrFOMeAu(II)Cl)

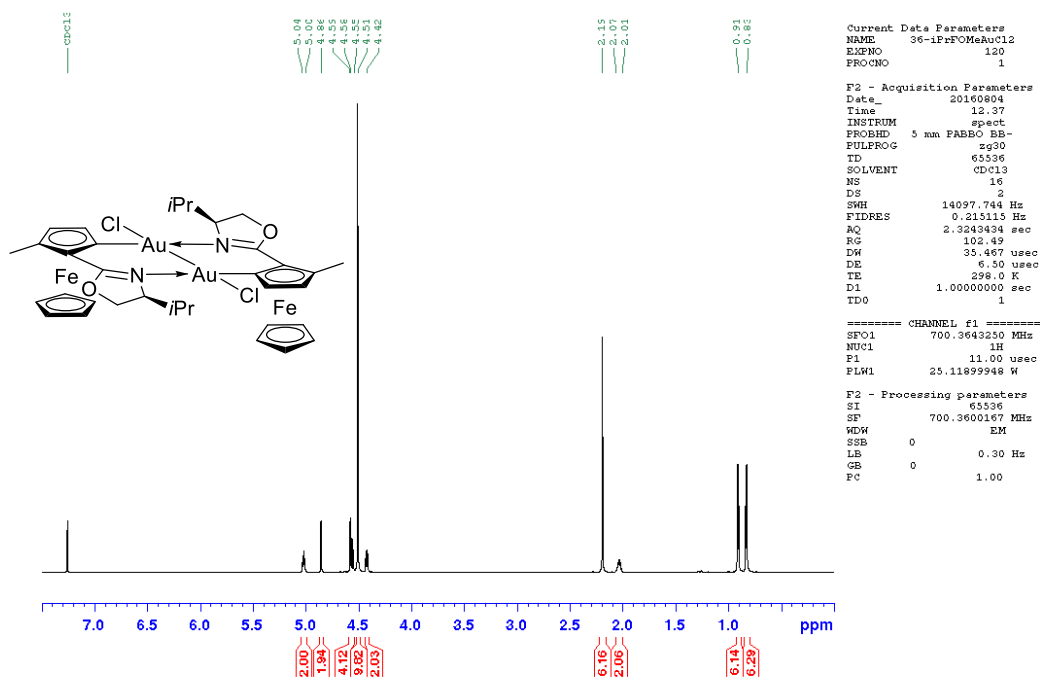

Figure S36  $^1\text{H}$  NMR spectrum at 700 MHz of Compound *i*PrFOMeAu(II)Cl in  $\text{CDCl}_3$ .

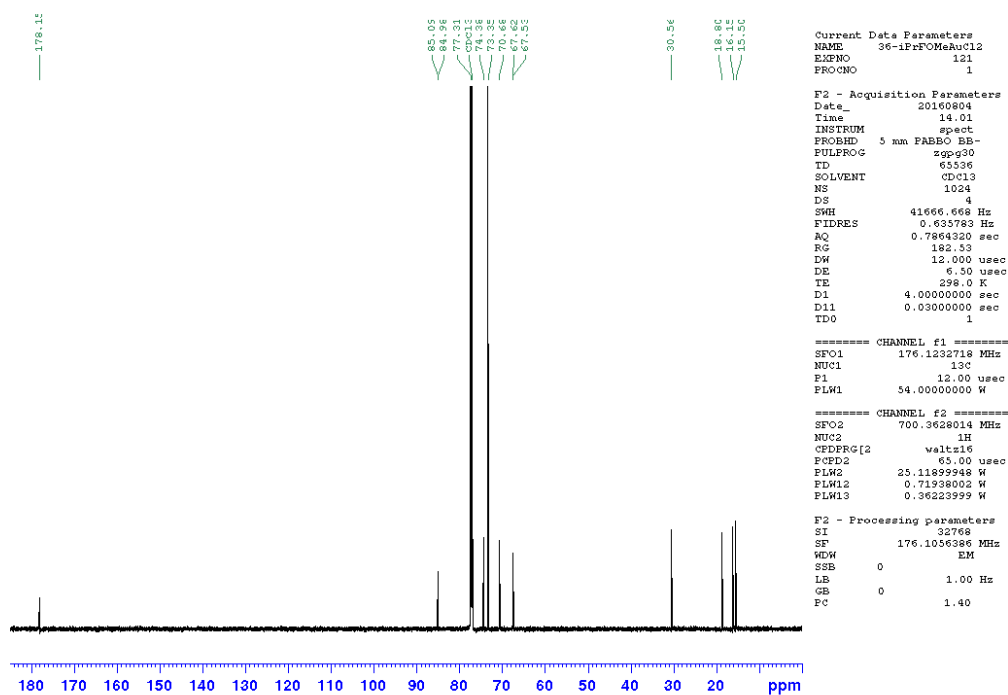

Dichlorobis[ $\mu$ -[( $\eta^5$ -(*S,R<sub>p</sub>*)-2-(4'-isopropyl-4',5'-dihydro-2'-oxazolyl- $\kappa$ N)-3-trimethylsilyl-cyclopentadienyl- $\kappa$ C)( $\eta^5$ -cyclopentadienyl) ferrocene]] digold(II) (*i*PrFOTMSAu(II)Cl)

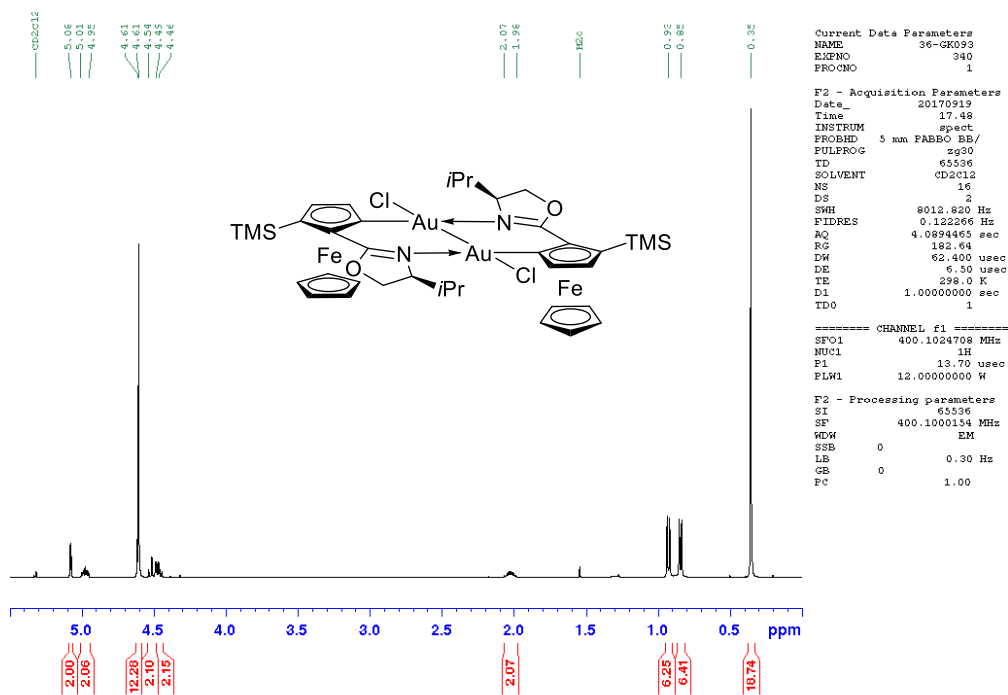

Figure S38  $^1\text{H}$  NMR spectrum at 400 MHz of Compound *i*PrFOTMSAu(II)Cl in  $\text{CD}_2\text{Cl}_2$ .

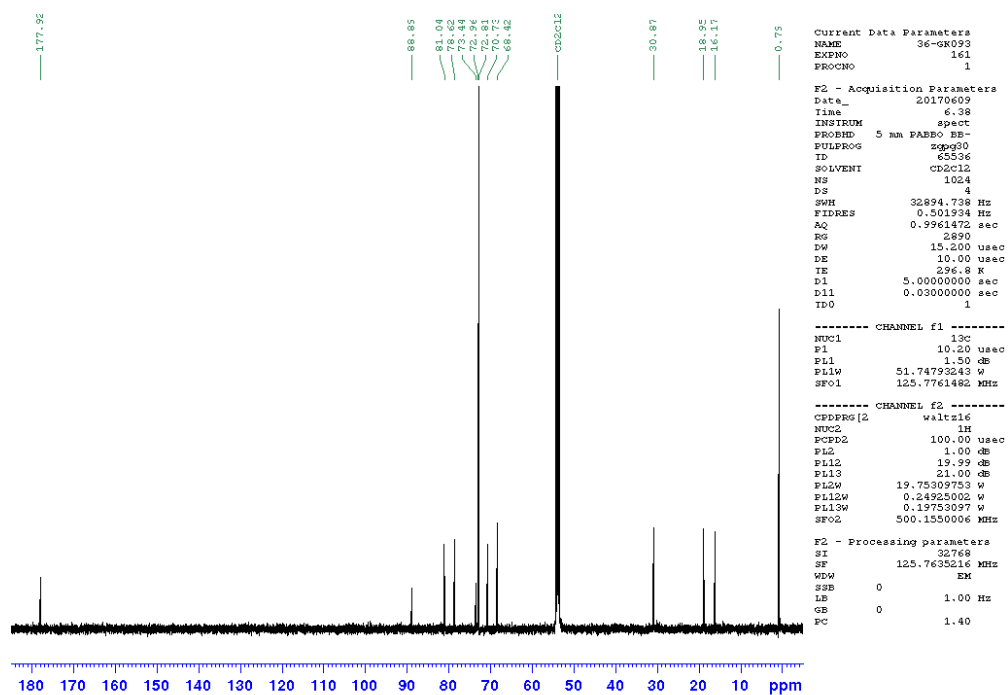

Figure S39  $^{13}\text{C}$   $\{^1\text{H}\}$  NMR spectrum at 125 MHz of Compound *i*PrFOTMSAu(II)Cl in  $\text{CD}_2\text{Cl}_2$ .

Dichlorobis[ $\mu$ -[( $\eta^5$ -(*S,R<sub>p</sub>*)-2-(4'-*tert*-butyl-4',5'-dihydro-2'-oxazolyl- $\kappa$ N)-3-methylcyclopentadienyl- $\kappa$ C)( $\eta^5$ -cyclopentadienyl) ferrocene]] digold(II) (*t*BuFOMeAu(II)Cl)

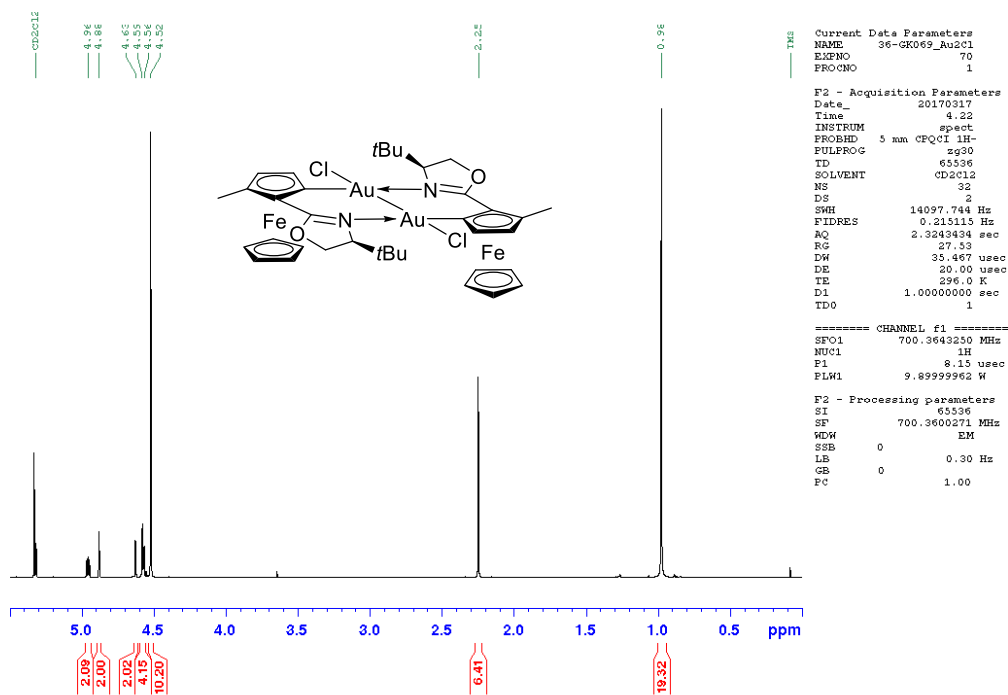

Figure S40  $^1\text{H}$  NMR spectrum at 700 MHz of Compound *t*BuFOMeAu(II)Cl in  $\text{CD}_2\text{Cl}_2$ .

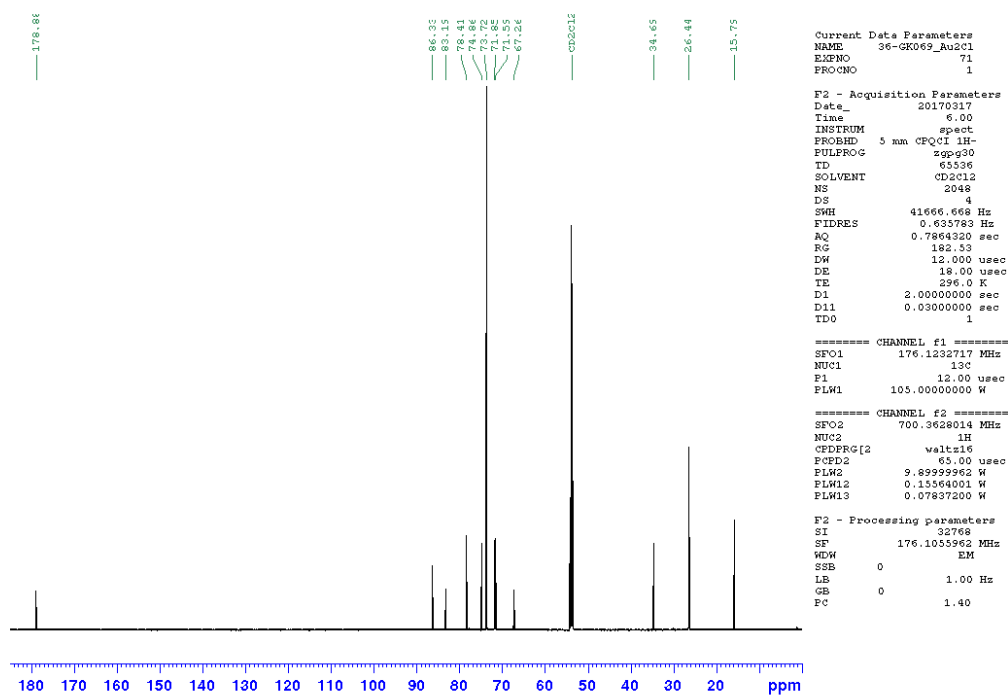

Figure S41  $^{13}\text{C}$   $\{^1\text{H}\}$  NMR spectrum at 175 MHz of Compound *t*BuFOMeAu(II)Cl in  $\text{CD}_2\text{Cl}_2$ .



Dichlorobis[ $\mu$ -[( $\eta^5$ -(*S,S*<sub>p</sub>)-2-(4',5'-5'*H*-Indeno[1,2-*d*]-4',5'-dihydro-2'-oxazolyl- $\kappa$ *N*)-3-methylcyclopentadienyl- $\kappa$ C)( $\eta^5$ -cyclopentadienyl) ferrocene]] digold(II) (IndFOMeAu(II)Cl)

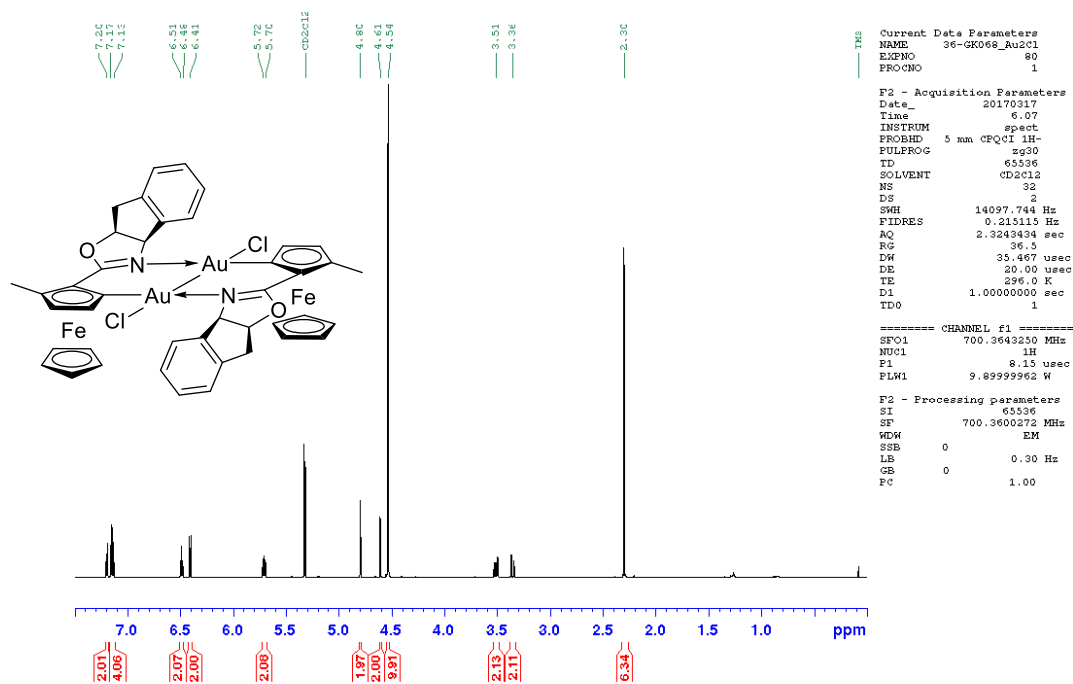

Figure S42 <sup>1</sup>H NMR spectrum at 700 MHz of Compound IndFOMeAu(II)Cl in CD<sub>2</sub>Cl<sub>2</sub>.

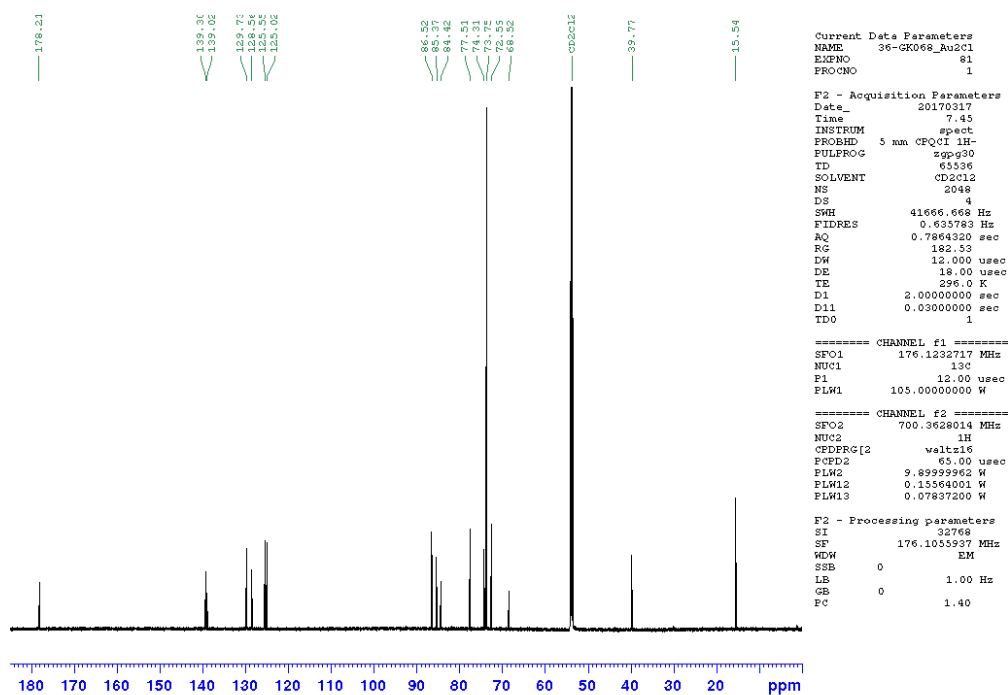

Figure S43 <sup>13</sup>C {<sup>1</sup>H} NMR spectrum at 175 MHz of Compound IndFOMeAu(II)Cl in CD<sub>2</sub>Cl<sub>2</sub>.

Dichlorobis[ $\mu$ -[( $\eta^5$ -(*S,S*<sub>p</sub>)-2-(4',5'-diphenyl-4',5'-dihydro-2'-oxazolyl- $\kappa$ N)-3-methylcyclopentadienyl- $\kappa$ C)( $\eta^5$ -cyclopentadienyl) ferrocene]] digold(II) (Ph<sub>2</sub>FOMeAu(II)Cl)

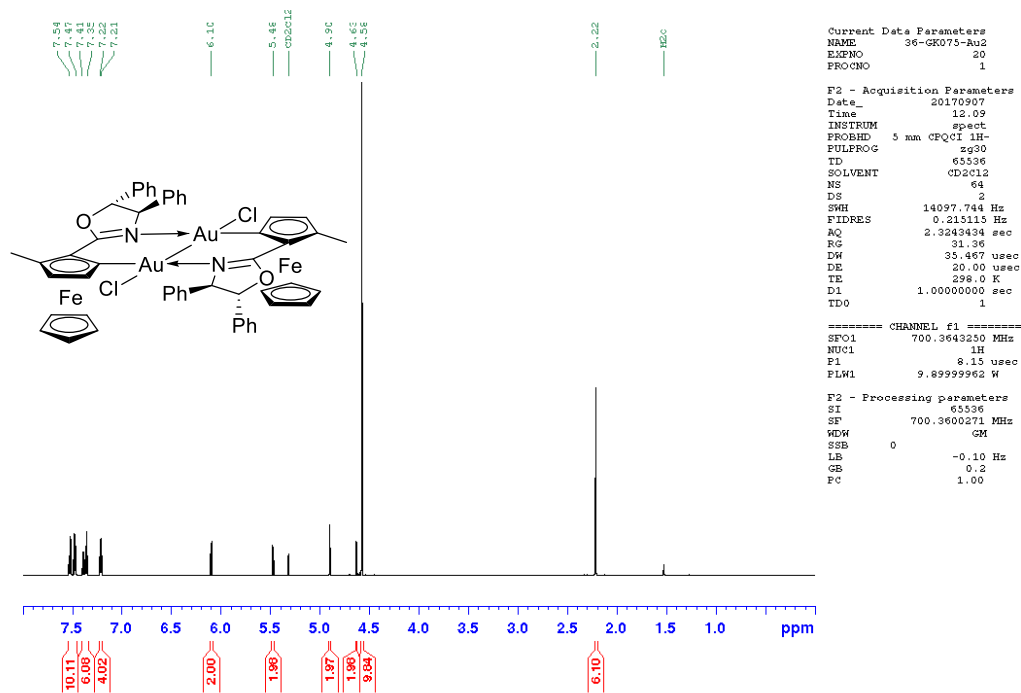

Figure S44 <sup>1</sup>H NMR spectrum at 700 MHz of Compound Ph<sub>2</sub>FOMeAu(II)Cl in CD<sub>2</sub>Cl<sub>2</sub>.

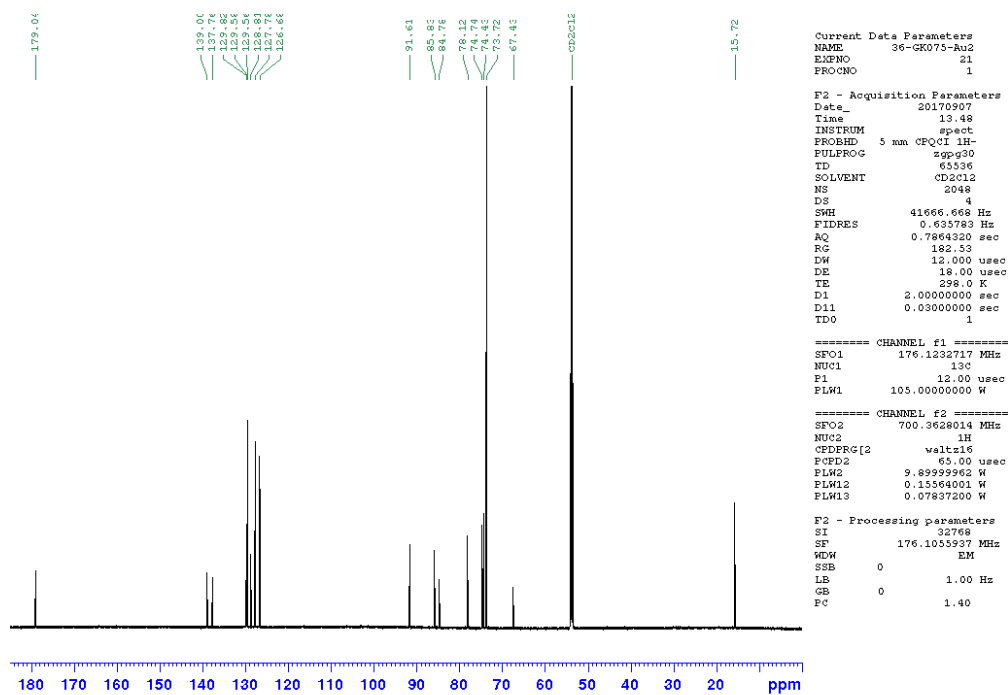

Figure S45 <sup>13</sup>C {<sup>1</sup>H} NMR spectrum at 175 MHz of Compound Ph<sub>2</sub>FOMeAu(II)Cl in CD<sub>2</sub>Cl<sub>2</sub>.

**Dibromobis[ $\mu$ -[( $\eta^5$ -(*S,R\_p*)-2-(4'-isopropyl-4',5'-dihydro-2'-oxazolyl- $\kappa$ N)-3-methyl-cyclopentadienyl- $\kappa$ Cl)( $\eta^5$ -cyclopentadienyl) ferrocene]] digold(II) (*iPr*FOMeAu(II)Br)**

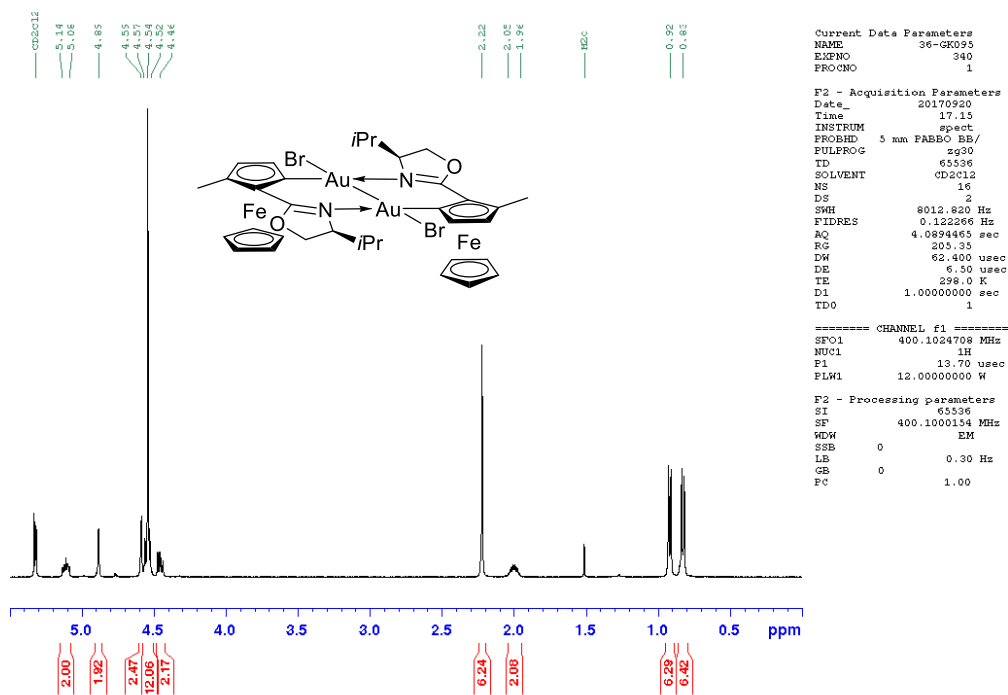

**Figure S46**  $^1\text{H}$  NMR spectrum at 400 MHz of Compound *iPr*FOMeAu(II)Br in  $\text{CD}_2\text{Cl}_2$ .

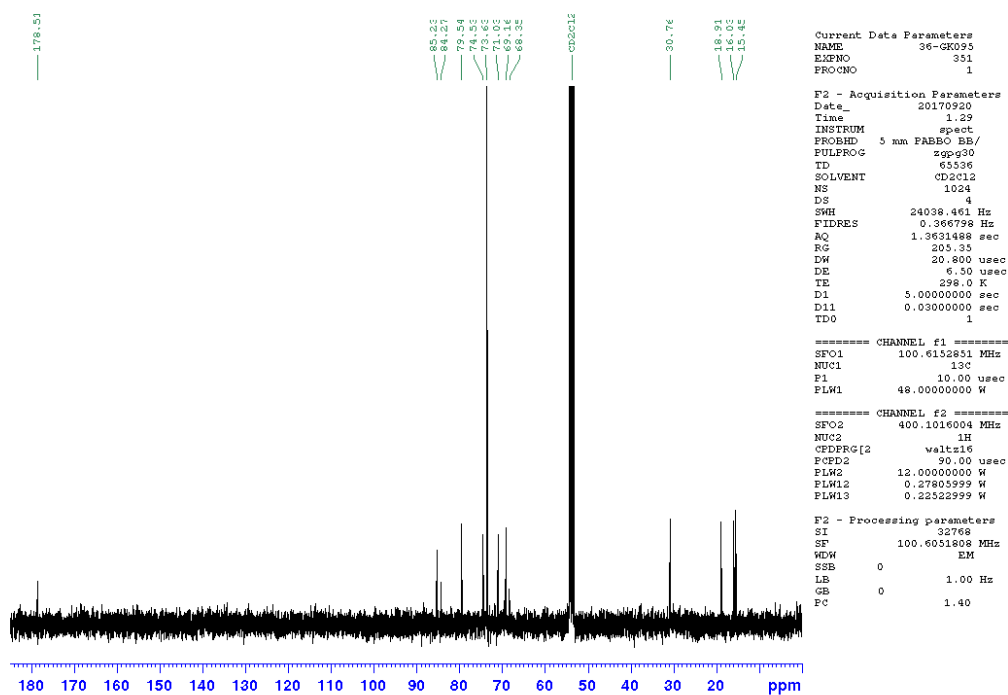

**Figure S47**  $^{13}\text{C}$   $\{^1\text{H}\}$  NMR spectrum at 100 MHz of Compound *iPr*FOMeAu(II)Br in  $\text{CD}_2\text{Cl}_2$ .

**Diiodobis[ $\mu$ -[( $\eta^5$ -(*S,R*<sub>p</sub>)-2-(4'-isopropyl-4',5'-dihydro-2'-oxazolyl- $\kappa$ N)-3-methyl-cyclopentadienyl- $\kappa$ CI)( $\eta^5$ -cyclopentadienyl) ferrocene]] digold(II) (*i*PrFOMeAu(II)I)**

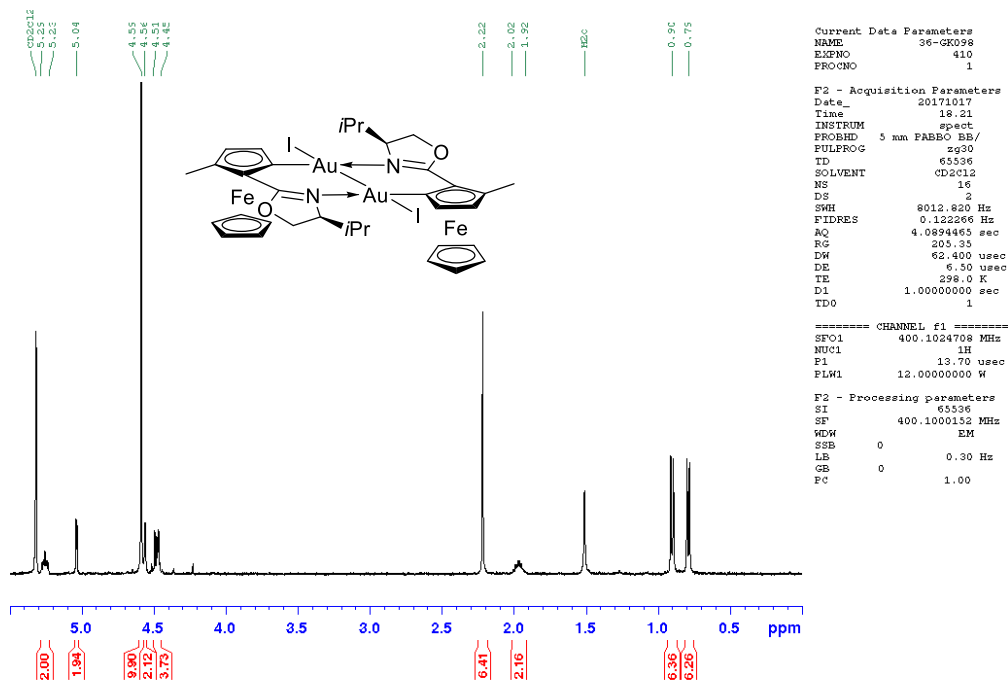

**Figure S48**  $^1\text{H}$  NMR spectrum at 400 MHz of Compound *i*PrFOMeAu(II)I in  $\text{CD}_2\text{Cl}_2$ .

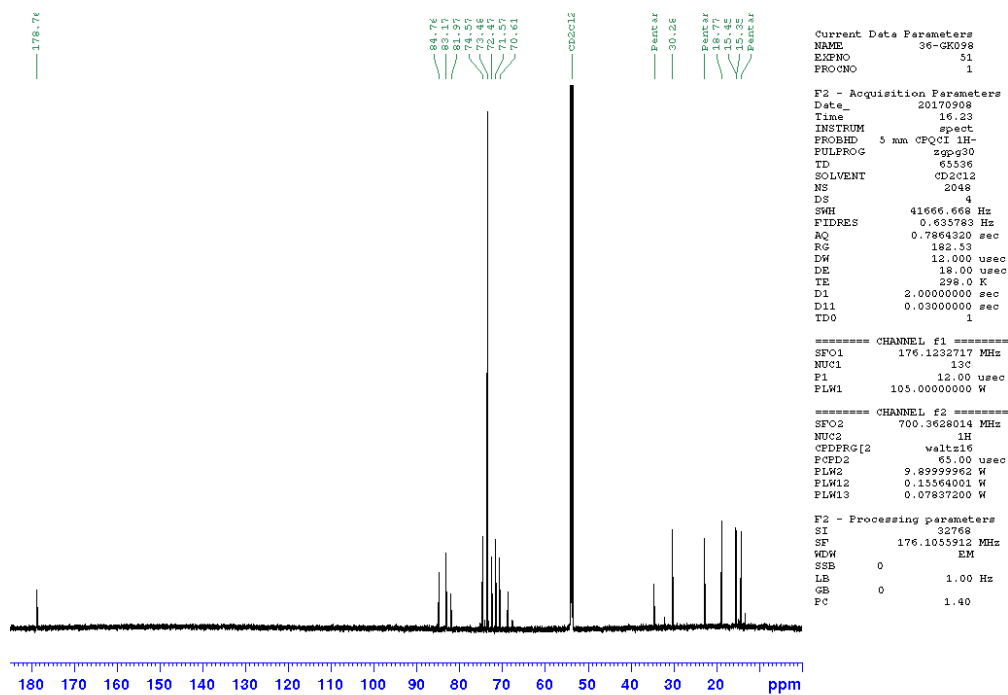

**Figure S49**  $^{13}\text{C}$   $\{^1\text{H}\}$  NMR spectrum at 175 MHz of Compound *i*PrFOMeAu(II)I in  $\text{CD}_2\text{Cl}_2$ .

**(*S,R<sub>p</sub>,S,R<sub>p</sub>*)-2,2'-Bis[(4-Isopropyl-4,5-dihydro-2-oxazolyl)-3-methyl]  
(*iPrFOMe*)<sub>2</sub>**

**1,1'-biferrocenyl**

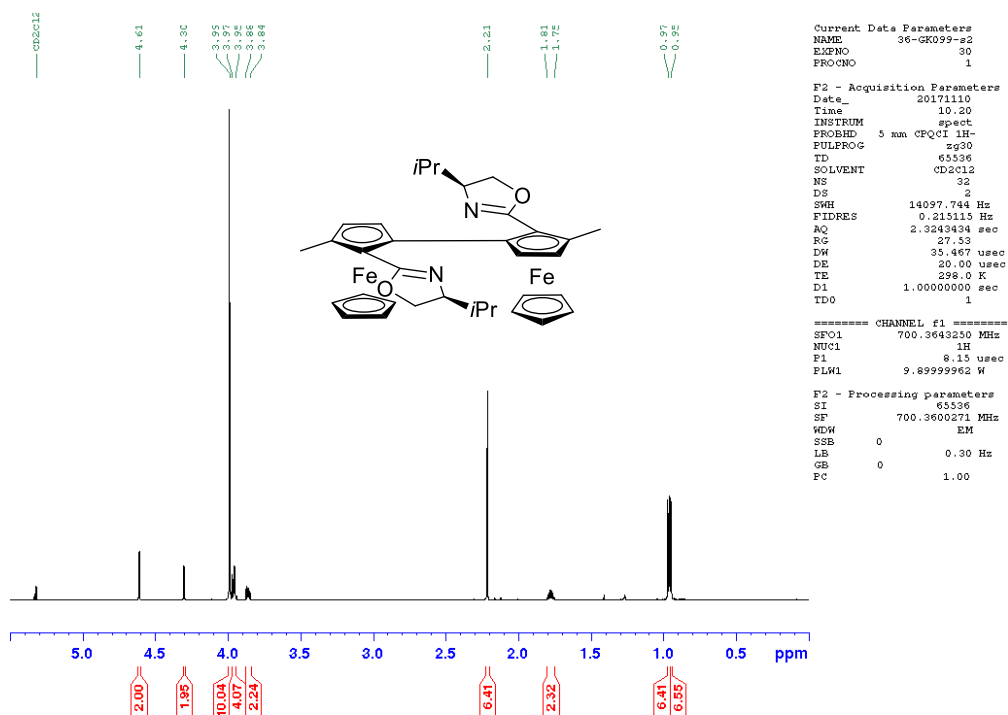

Figure S50 <sup>1</sup>H NMR spectrum at 700 MHz of Compound (*iPrFOMe*)<sub>2</sub> in CD<sub>2</sub>Cl<sub>2</sub>.

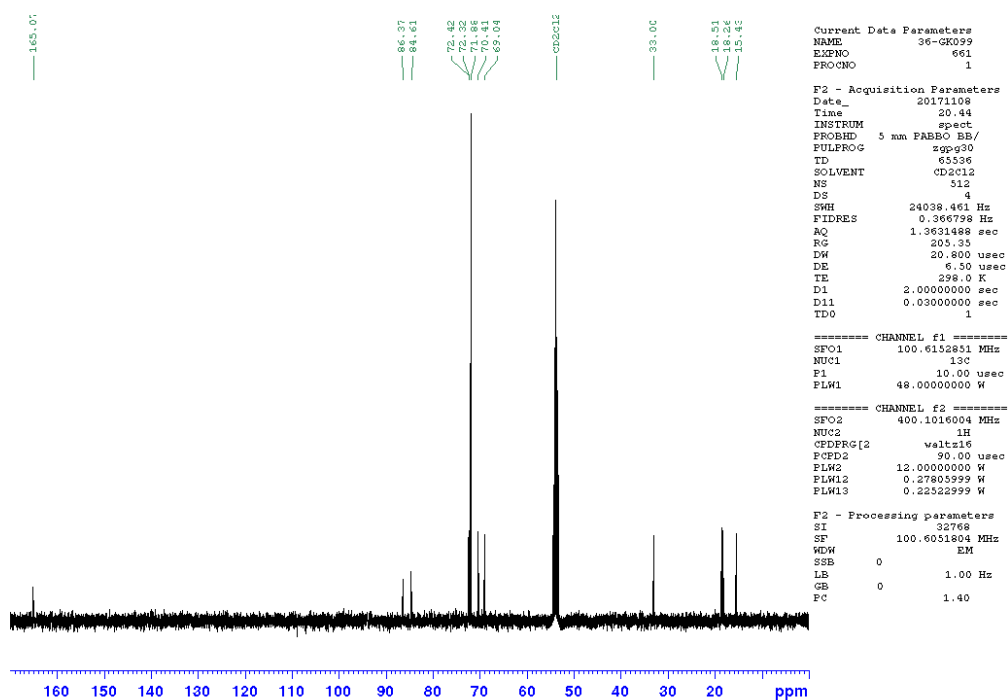

Figure S51 <sup>13</sup>C {<sup>1</sup>H} NMR spectrum at 100 MHz of Compound (*iPrFOMe*)<sub>2</sub> in CD<sub>2</sub>Cl<sub>2</sub>.

**Diacetatobis[ $\mu$ -[( $\eta^5$ -(*S,R\_p*)-2-(4'-isopropyl-4',5'-dihydro-2'-oxazolyl- $\kappa$ N)-3-methylcyclopentadienyl- $\kappa$ CI)( $\eta^5$ -cyclopentadienyl) ferrocene]] digold(II) (*iPr*FOMeAu(II)OAc)**

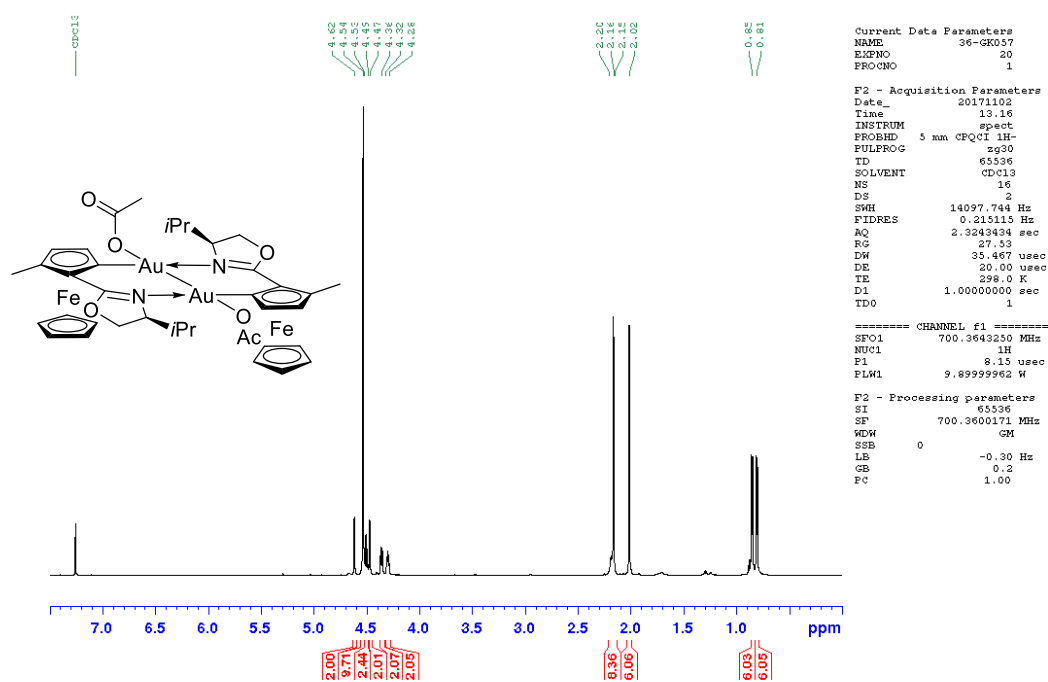

**Figure S52**  $^1\text{H}$  NMR spectrum at 700 MHz of Compound *iPr*FOMeAu(II)OAc in  $\text{CDCl}_3$ .

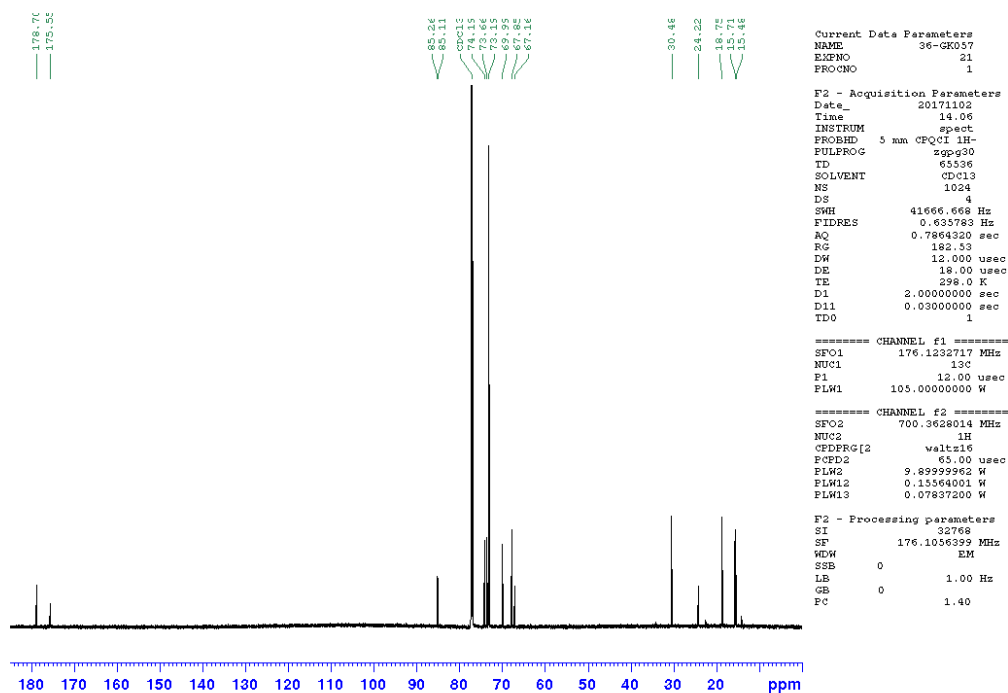

**Figure S53**  $^{13}\text{C}$   $\{^1\text{H}\}$  NMR spectrum at 175 MHz of Compound *iPr*FOMeAu(II)OAc in  $\text{CDCl}_3$ .

## UV-Vis Spectra

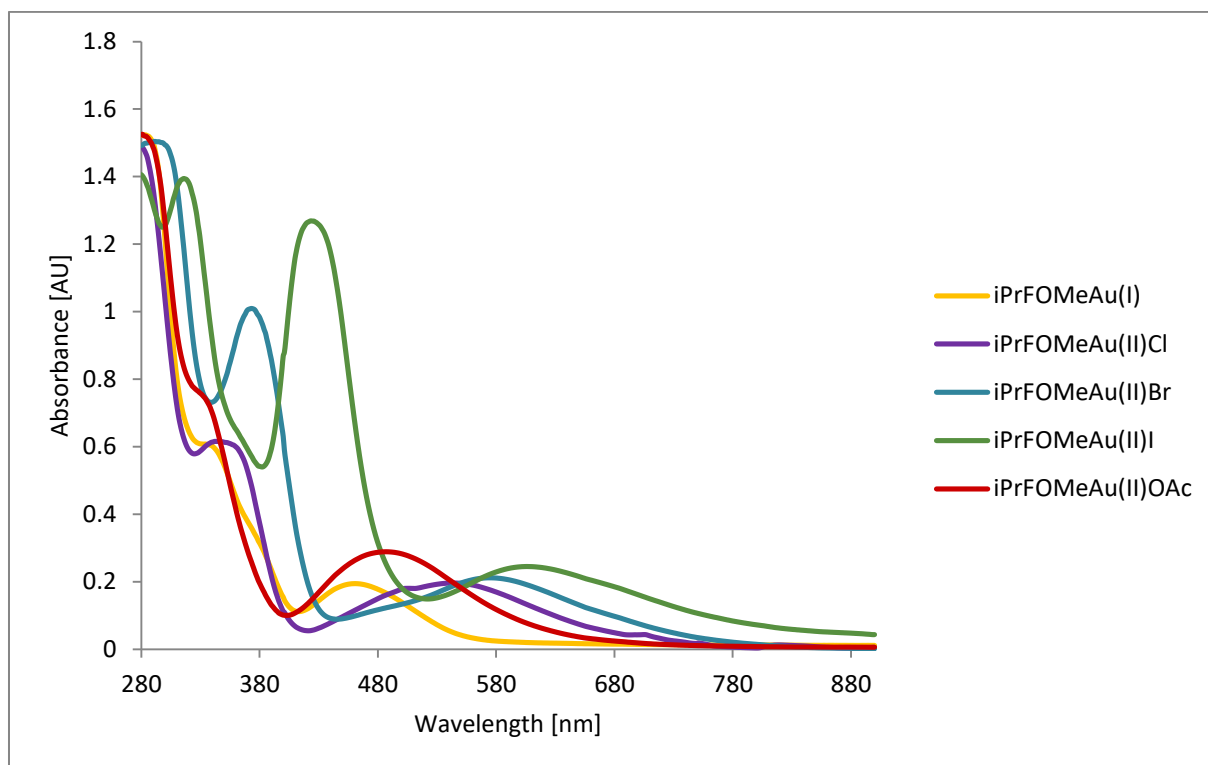

**Figure S54** UV-Vis-Absorbance spectra for Au-complexes derived from ligand *iPrFOMe*.

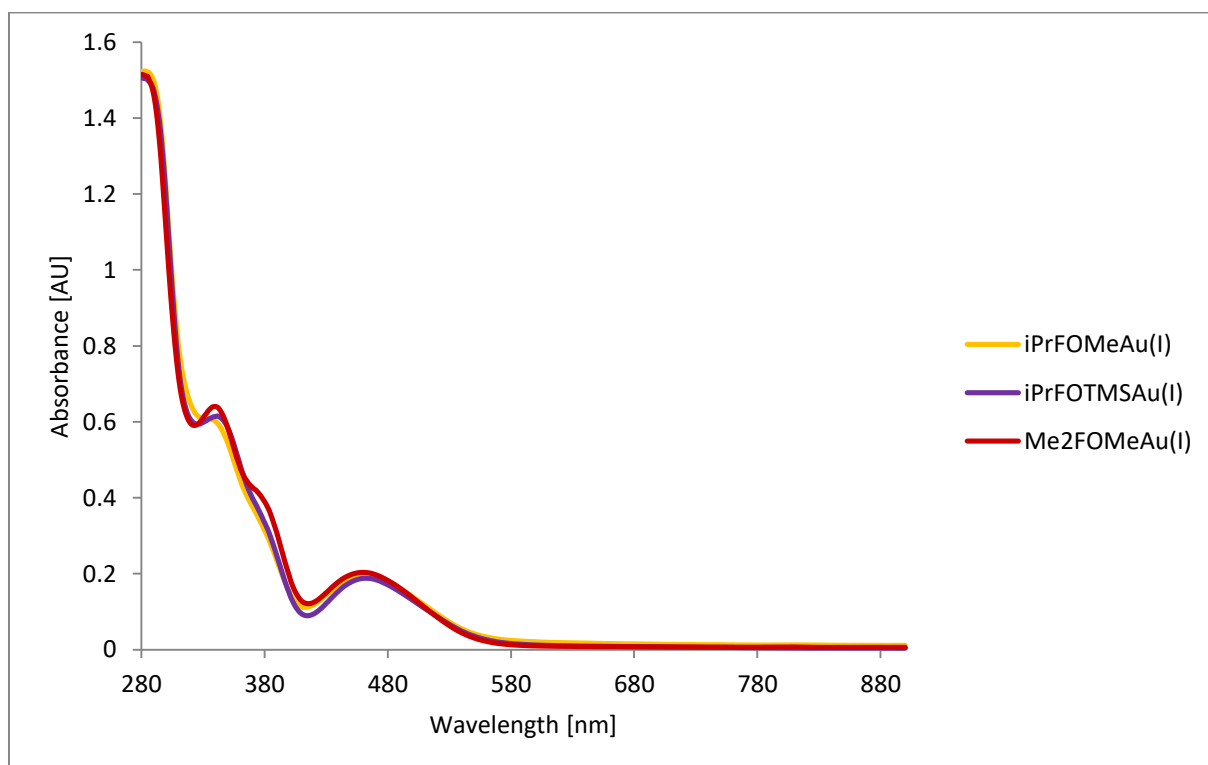

**Figure S55** UV-Vis-Absorbance spectra of Au(I) complexes with different ligands.

## CD-Spectra

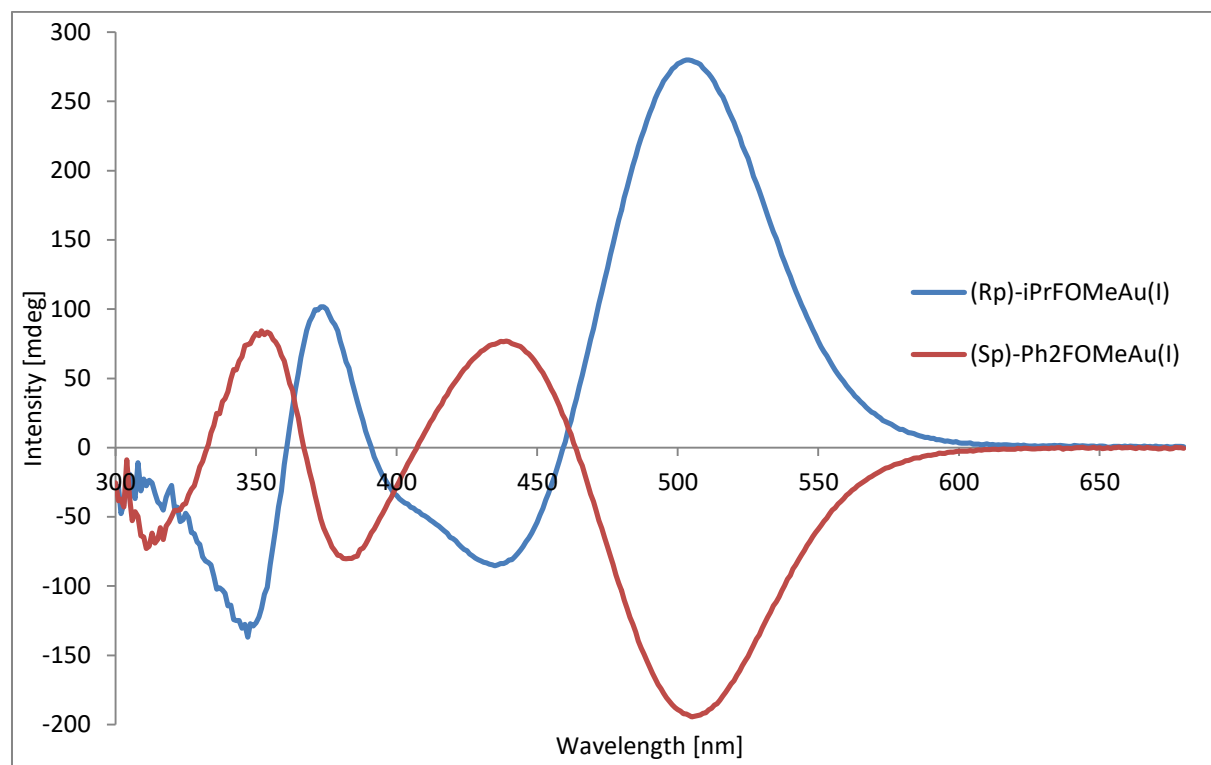

**Figure S56** CD-spectra for Au(I)-complexes (concentrations used: (*R<sub>p</sub>*)-iPrFOMeAu(I): 0.89 mmol/L; (*S<sub>p</sub>*)-Ph<sub>2</sub>FOMeAu(I): 0.49 mmol/L).

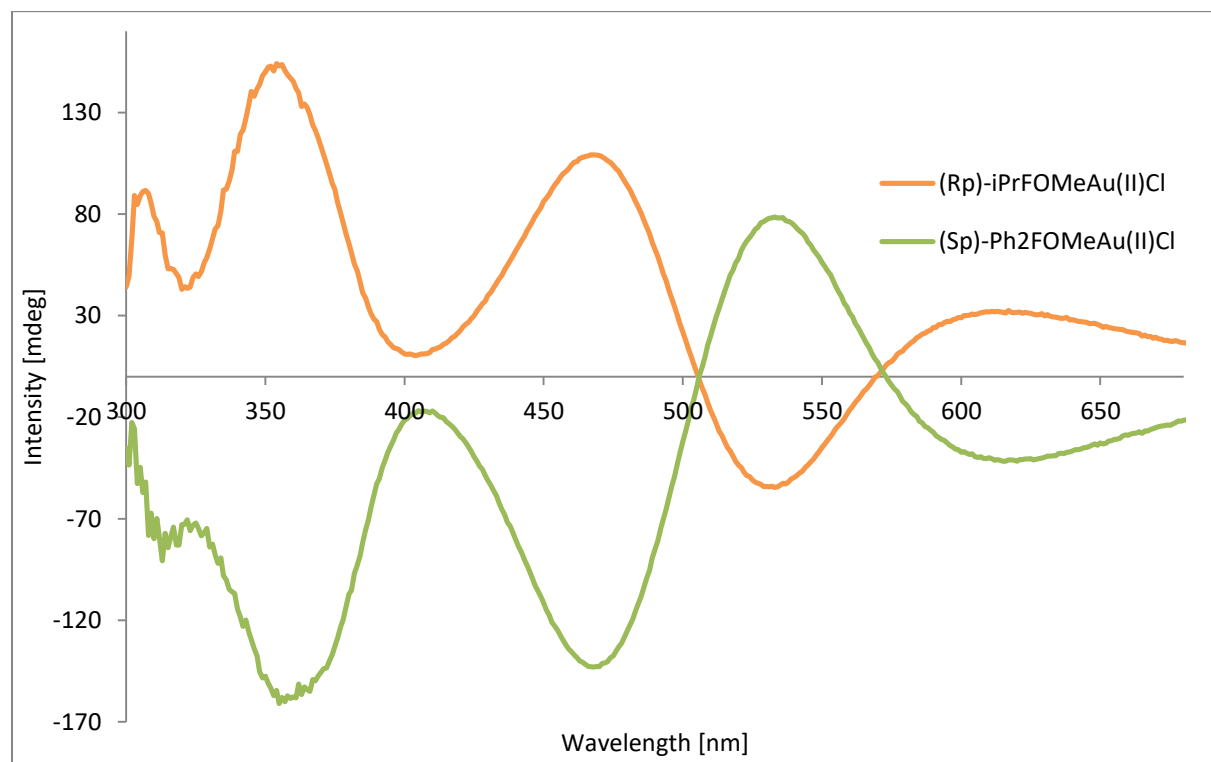

**Figure S57** CD-spectra for Au(II)-complexes (concentrations used: (*R<sub>p</sub>*)-iPrFOMeAu(II)Cl: 0.27 mmol/L; (*S<sub>p</sub>*)-Ph<sub>2</sub>FOMeAu(II)Cl: 0.27 mmol/L).
